# Supplementary material for: Integration of metabolites from meta-analysis with transcriptome reveals enhanced SPHK1 in PDAC with a background of pancreatitis
Source: BMC Cancer. 2022 Jul 19;22:792. doi: 10.1186/s12885-022-09816-6 (PMC9295503; doi:10.1186/s12885-022-09816-6)
Supplement: Supplementary file 2 — Additional file 2: Dataset S1. Circulatory metabolites identified in chronic pancreatitis, pancreatic cancer and pancreatic ductal adenocarcinoma using metabolomics platforms. [file 12885_2022_9816_MOESM2_ESM.xlsx]

## Sheet: table
S.No	Study	Metabolomics approach	Platforms	Specimen	Patients(n)	Controls(n)	Biomarkers
1	Elebo N et al. 2021	Untargeted	NMR	Serum	PDAC(34)	CP(6);H(6)	Cholesterol derivatives,fatty acids, phosphatidylcholine, sphingomyelin, triglyceride, glycerophospolipid,formate, phenylalanine, tyrosine, histidine, glucose, mannose, threonine, lactate, creatinine, creatine, glycine, methanol, citrate, glutamine, pyruvate, glutamate, acetoacetate, alanine, ethanol, valine, isoleucine, leucine, 2 hydroxybutyrate
2	Xiaohan Zhang et al. 2020	Untargeted	LC-MS	Serum	PDAC(354)	H(196)	histidinyl-lysine,docosahexaenoic acid, LysoPC
3	Blazquez et al. 2020	Untargeted	LC-MS	Serum	PDAC(59)	H(60)	PS(12:0/15:1), TG(22:2/15:0/18:3), 4-oxo-Retinoic acid, Androsterone sulfate, LysoPE(18:2), Phenylalanylphenylalanine, all-trans-Decaprenyldiphosphate, LysoPC(18:2), Dehydroepiandrosterone sulfate
4	Fest et al. 2019	Targeted	NMR	Serum and Plasma	PC(444)	H(1011)	Glutamaine and Histidine
5	Mayerle et al. 2018	Untargeted	LC-QqQ-MS	Serum and Plasma	PDCAC(79)	CP(80);H(80)	CA19-9, Proline, sphingomyelin (d18:2,C17:0), phosphatidylcholine (C18:0,C22:6), isocitrate, sphinganine-1-phosphate (d18:0), histidine, pyruvate, ceramide (d18:1,C24:0), sphingomyelin (d17:1,C18:0)
6	Hirata et al. 2017	Targeted	GC/QqQ-MS	Serum and plasma	PDAC(54)	H(58)	Histidine, inositol, 1,5-anhydro-d-glucitol, xylitol
7	Itoi et al. 2017	Untargeted	CE/TOF MS	Serum	PC(27)	H and CP(46)	Glutamic acid,Histidine,Glutamine,Trimethylamine N- oxide,Serine
8	Peces et al. 2017	Untargeted	LC-QTOF-MS	Serum	PDAC(16)	H(12)	LPC (18:0), LPC (18:2(9Z,12Z)), LPC (18:3(6Z,9Z,12Z)), LPE (18:2(9Z,12Z)/0:0)
9	Suzuki et al. 2017	Untargeted	SFE-SFC/QqQ-MS and LC/QqQ-MS	Serum	PC(18)	H(16)	Hypoxanthine, xanthine, LPC (20:4) (sn-1), LPC (22:6) (sn-1), LPC (22:6) (sn-2), PC 14:0- 16:1, PC 16:0- 18:2/16:1-18:1, PC 16:1e−20:3, PC 16:0-20:4/16:1- 20:3, PC 18:0- 18:0, PC 20:0-18:1
10	Lindahl et al. 2017	Untargeted	LC-HRMS orbitrap and QTOF	Serum and plasma	PDAC(44)	CP(23)	Glycocholic acid, N-palmitoyl glutamic acid, hexanoylcarnitine, phenylacetylglutamine and chenodeoxyglycocholate
11	Gangi et al. 2016	Targeted	LC and DI/QqQ-MS	Serum	PDAC(40)	H(40)	Palmitic acid
12	Sakai et al. 2016	Untargeted	GC/Q-MS and LC-QqQ-MS	Serum	PC(15)	H(15)	1,5 - Anhydro-D-glucitol,Mannose,LPC(18:0) (sn-1)
13	Akita et al. 2016	Targeted	LC/QqQ-MS	Serum	PC(116)	H(138)	PC 594, PC (18:0/18:2),LysoPC(18:2),Sphingomyelin (18:1/24:0)
14	Fukutake et al. 2015	Targeted	LC-ESI-MS	Plasma	PC(240)	CP(28); H(7772)	Serine, asparagine, alanine, isoleucine, histidine, tryptophan
15	Xie et al. 2015	Untargeted	GC and LC/ToF-MS	Plasma	PDAC(100)	H(100)	Glutamate, choline, 1,5-anhydro-d-glucitol, betaine, and methylguanidine
16	Mayers et al. 2014	Targeted	LC-MS	Plasma	PDAC(453)	H(898)	Isoleucine, Leucine and Valine
17	Zhang Y et.al 2014	Targeted	CBD-InaO-ESI/FTICR-MS	Serum	PC(67)	CP(61); H(145)	C18:2,C18:3,C20:4, C22:6, C16:1, C18:2/C18:1, C18:3/C18:1, C18:1
18	Kobayashi et al. 2013	Untargeted	GC-QMS	Serum	PC(42)	H(23); CP(41)	Xylitol, 1,5-anhydrod- glucitol, histidine, inositol
19	Leichtle et al. 2013	Targeted	FIA MS MS	Serum	PC(20)	H(20);CP(26)	Amino acids
20	Ritchie et al. 2013	Untargeted	FI-FTICR-MS and FI/QqQ MS	Serum	PC(14)	H(40)	Long chain fatty acids, Phosphatidylethanolamine, Phosphatidylcholine, Lysophosphatidyl choline
21	Zhang L et al. 2012	Untargeted	NMR	Serum	PC(20)	CP(19); H(20)	DMA, acetone, 3-hydroxybutyrate, creatine, lactate, citrate, lipid glyceryl, formate, alanine, glutamate, glutamine, histidine, isoleucine, lysine, tyrosine, phenylalanine, and valine
22	Bathe et al. 2011	Untargeted	NMR	Serum	PDAC(56)	CP(43)	Glutamate, acetone,3-hydroxy- butyrate, glucose, phenylalanine, formate, and mannose
23	Zhang H et al. 2011	Untargeted	pCEC-UV	Plasma	PC(13)	H(13)	8 identified metabolites peak and retention times(metabolites not matched with HMDB)
24	Nishiumi et al. 2010	Untargeted	GC-Q-MS	Serum	PC(20)	H(9)	L-glycine, 3-Hydroxy butyric acid, decanoic acid, 4-hydroxyproline, 7-hydroxyoctanoic acid, l-glutamic acid, 4-hydroxy phenylacetic acid, tartaric acid, asparagine, homogentisic acid, palmitoleic acid, palmitic acid, N-acetyltyrosine
25	Beger et al. 2006	Untargeted	1H-NMR and LC/ESI-MS-MS	Plasma	PDAC(91)	H(90)	PI(18:0, 18:2),PI(18:0, 20:4),PI(18:0, 20:2)
