# Supplementary material for: Integration of metabolites from meta-analysis with transcriptome reveals enhanced SPHK1 in PDAC with a background of pancreatitis
Source: BMC Cancer. 2022 Jul 19;22:792. doi: 10.1186/s12885-022-09816-6 (PMC9295503; doi:10.1186/s12885-022-09816-6)
Supplement: Supplementary file 4 — Additional file 4: Dataset S3. Metabolites list derived from metabolomics studies comparing healthy controls and pancreatic cancer/PDAC; healthy controls/chronic pancreatitis and pancreatic cancer/PDAC; chronic pancreatitis and pancreatic cancer/PDAC. [file 12885_2022_9816_MOESM4_ESM.xlsx]

## Sheet: Set1-CTVsPancreaticcancer
Query	Match	HMDB	PubChem	KEGG	SMILES	Foldchange/Levels	p-Values	Ratio
HMDB0010395	LysoPC(20:4(5Z,8Z,11Z,14Z))	HMDB0010395	24779476	C04230	CCCCC/C=C\C/C=C\C/C=C\C/C=C\CCCC(=O)OC[C@H](COP(=O)([O-])OCC[N+](C)(C)C)O	1.431	0.036	PC/H
HMDB0010404	LysoPC(22:6(4Z,7Z,10Z,13Z,16Z,19Z))	HMDB0010404	10415542	C04230	CC/C=C\C/C=C\C/C=C\C/C=C\C/C=C\C/C=C\CCC(=O)OC[C@H](COP(=O)([O-])OCC[N+](C)(C)C)O	1.452	0.027	PC/H
HMDB0007870	PC(14:0/16:1(9Z))	HMDB0007870	24778615	C00157	CCCCCCCCCCCCCC(=O)OC[C@H](COP(=O)([O-])OCC[N+](C)(C)C)OC(=O)CCCCCCC/C=C\CCCCCC	1.193	0.027	PC/H
HMDB0007973	PC(16:0/18:2(9Z,12Z))	HMDB0007973	5287971	C00157	CCCCCCCCCCCCCCCC(=O)OC[C@H](COP(=O)([O-])OCC[N+](C)(C)C)OC(=O)CCCCCCC/C=C\C/C=C\CCCCC	1.155	0.022	PC/H
HMDB0008013	PC(16:1(9Z)/20:3(5Z,8Z,11Z))	HMDB0008013	53478679	C00157	CCCCCCCC/C=C\C/C=C\C/C=C\CCCC(=O)O[C@H](COC(=O)CCCCCCC/C=C\CCCCCC)COP(=O)([O-])OCC[N+](C)(C)C	1.301	0.048	PC/H
HMDB0007982	PC(16:0/20:4(5Z,8Z,11Z,14Z))	HMDB0007982	10747814	C00157	CCCCCCCCCCCCCCCC(=O)OC[C@H](COP(=O)([O-])OCC[N+](C)(C)C)OC(=O)CCC/C=C\C/C=C\C/C=C\C/C=C\CCCCC	1.205	0.039	PC/H
HMDB0008036	PC(18:0/18:0)	HMDB0008036	94190	C00157	CCCCCCCCCCCCCCCCCC(=O)OC[C@H](COP(=O)([O-])OCC[N+](C)(C)C)OC(=O)CCCCCCCCCCCCCCCCC	2.278	0.001	PC/H
HMDB0008269	PC(20:0/18:1(9Z))	HMDB0008269	24779038	C00157	CCCCCCCCCCCCCCCCCCCC(=O)OC[C@H](COP(=O)([O-])OCC[N+](C)(C)C)OC(=O)CCCCCCC/C=C\CCCCCCCC	1.511	0.002	PC/H
HMDB0000157	Hypoxanthine	HMDB0000157	790	C00262	C1=NC2=C(N1)C(=O)N=CN2	1.546	0.014	PC/H
HMDB0000292	Xanthine	HMDB0000292	1188	C00385	C1=NC2=C(N1)C(=O)NC(=O)N2	1.317	0.039	PC/H
HMDB0010384	LysoPC(18:0)	HMDB0010384	497299	C04230	CCCCCCCCCCCCCCCCCC(=O)OC[C@H](COP(=O)([O-])OCC[N+](C)(C)C)O	0.578	0.000732	PC/H
HMDB0010386	LysoPC(18:2(9Z,12Z))	HMDB0010386	11005824	C04230	CCCCC/C=C\C/C=C\CCCCCCCC(=O)OC[C@H](COP(=O)([O-])OCC[N+](C)(C)C)O	0.5861	5.73e-05	PC/H
HMDB0010387	LysoPC(18:3(6Z,9Z,12Z))	HMDB0010387	52924045	C04230	CCCCC/C=C\C/C=C\C/C=C\CCCCC(=O)OC[C@H](COP(=O)([O-])OCC[N+](C)(C)C)O	0.618	0.000871	PC/H
HMDB0011507	LysoPE(18:2(9Z,12Z)/0:0)	HMDB0011507	52925130	NA	CCCCC/C=C\C/C=C\CCCCCCCC(=O)OC[C@H](COP(=O)(O)OCCN)O	0.5851	7.82e-05	PC/H
HMDB0000177	L-Histidine	HMDB0000177	6274	C00135	C1=C(NC=N1)C[C@@H](C(=O)O)N	↓		PC/H
HMDB0002712	1,5-Anhydrosorbitol	HMDB0002712	64960	C07326	C1[C@@H]([C@H]([C@@H]([C@H](O1)CO)O)O)O	↓		PC/H
HMDB0000169	D-Mannose	HMDB0000169	18950	C00936	C([C@@H]1[C@H]([C@@H]([C@@H](C(O1)O)O)O)O)O	↓		PC/H
HMDB0000220	Palmitic acid	HMDB0000220	985	C00249	CCCCCCCCCCCCCCCC(=O)O	↓		PC/H
HMDB0002364	Oleanolic acid	HMDB0002364	10494	C17148	C[C@]12CC[C@@H](C([C@@H]1CC[C@@]3([C@@H]2CC=C4[C@]3(CC[C@@]5([C@H]4CC(CC5)(C)C)C(=O)O)C)C)(C)C)O	↓		PC/H
HMDB0008039	PC(18:0/18:2(9Z,12Z))	HMDB0008039	6441487	C00157	CCCCCCCCCCCCCCCCCC(=O)OC[C@H](COP(=O)([O-])OCC[N+](C)(C)C)OC(=O)CCCCCCC/C=C\C/C=C\CCCCC	↓		PC/H
HMDB0011697	SM(d18:1/24:0)	HMDB0011697	5283595	NA	CCCCCCCCCCCCCCCCCCCCCCCC(=O)N[C@@H](COP(=O)(O)OCC[N+](C)(C)C)[C@@H](/C=C/CCCCCCCCCCCCC)O	↓		PC/H
HMDB0008991	PE(18:0/18:0)	HMDB0008991	447078	C00350	CCCCCCCCCCCCCCCCCC(=O)OC[C@H](COP(=O)(O)OCCN)OC(=O)CCCCCCCCCCCCCCCCC	↓		PC/H
HMDB0002917	D-Xylitol	HMDB0002917	6912	C00379	C([C@H](C([C@H](CO)O)O)O)O	0.75		PC/H
HMDB0000211	myo-Inositol	HMDB0000211	NA	C00137	O[C@H]1[C@H](O)[C@@H](O)[C@H](O)[C@H](O)[C@@H]1O	1.13		PC/H
HMDB0000123	Glycine	HMDB0000123	750	C00037	C(C(=O)O)N	0.76		PC/H
HMDB0000011	(R)-3-Hydroxybutyric acid	HMDB0000011	92135	C01089	C[C@H](CC(=O)O)O	2.49		PC/H
HMDB0000725	4-Hydroxyproline	HMDB0000725	5810	C01157	C1[C@H](CN[C@@H]1C(=O)O)O	1.29		PC/H
HMDB0000486	7-Hydroxyoctanoic acid	HMDB0000486	167627	NA	CC(CCCCCC(=O)O)O	1.38		PC/H
HMDB0000779	Phenyllactic acid	HMDB0000779	3848	C01479	C1=CC=C(C=C1)CC(C(=O)O)O	1.89		PC/H
HMDB0000956	Tartaric acid	HMDB0000956	444305	C00898	O[C@H]([C@@H](O)C(O)=O)C(O)=O	1.47		PC/H
HMDB0000168	L-Asparagine	HMDB0000168	6267	C00152	C([C@@H](C(=O)O)N)C(=O)N	1.35		PC/H
HMDB0000130	Homogentisic acid	HMDB0000130	780	C00544	C1=CC(=C(C=C1O)CC(=O)O)O	1.26		PC/H
HMDB0003229	Palmitoleic acid	HMDB0003229	5312427	C08362	CCCCCC/C=C\CCCCCCCC(=O)O	1.31		PC/H
HMDB0000866	N-Acetyl-L-tyrosine	HMDB0000866	68310	C01657	CC(=O)N[C@@H](CC1=CC=C(C=C1)O)C(=O)O	1.57		PC/H
HMDB0009809	PI(18:0/18:2(9Z,12Z))	HMDB0009809	NA	C00626	[H][C@@](COC(=O)CCCCCCCCCCCCCCCCC)(COP(O)(=O)O[C@H]1C(O)C(O)C(O)[C@@H](O)C1O)OC(=O)CCCCCCC\C=C/C\C=C/CCCCC	↓		PC/H
HMDB0009815	PI(18:0/20:4(5Z,8Z,11Z,14Z))	HMDB0009815	NA	C00626	[H][C@@](COC(=O)CCCCCCCCCCCCCCCCC)(COP(O)(=O)O[C@H]1C(O)C(O)C(O)[C@@H](O)C1O)OC(=O)CCC\C=C/C\C=C/C\C=C/C\C=C/CCCCC	↓		PC/H
HMDB0009812	PI(18:0/20:2(11Z,14Z))	HMDB0009812	NA	C00626	[H][C@@](COC(=O)CCCCCCCCCCCCCCCCC)(COP(O)(=O)O[C@H]1C(O)C(O)C(O)[C@@H](O)C1O)OC(=O)CCCCCCCCC\C=C/C\C=C/CCCCC	↓		PC/H
HMDB0014291	Phosphatidylserine	HMDB0014291	6323481	NA	CCCC(=O)O[C@H](COC(=O)CC)COP(=O)(O)OC[C@@H](C(=O)O)N	↑		PC/H
HMDB0006285	4-oxo-Retinoic acid	HMDB0006285	6437063	C16678	CC1=C(C(CCC1=O)(C)C)/C=C/C(=C/C=C/C(=C/C(=O)O)/C)/C	↑		PC/H
HMDB0002759	Androsterone sulfate	HMDB0002759	159663	NA	C[C@]12CC[C@H](C[C@@H]1CC[C@@H]3[C@@H]2CC[C@]4([C@H]3CCC4=O)C)OS(=O)(=O)O	↓		PC/H
HMDB0013302	Phenylalanylphenylalanine	HMDB0013302	6993090	NA	C1=CC=C(C=C1)CC(C(=O)NC(CC2=CC=CC=C2)C(=O)O)N	↓		PC/H
HMDB0059616	all-trans-Decaprenyl diphosphate	HMDB0059616	5462210	C17432	CC(C)=CCCC(C)=CCCC(C)=CCCC(C)=CCCC(C)=CCCC(C)=CCCC(C)=CCCC(C)=CCCC(C)=CCCC(C)=CCOP(O)(=O)OP(O)(O)=O	↑		PC/H
HMDB0001032	Dehydroepiandrosterone sulfate	HMDB0001032	12594	C04555	C[C@]12CC[C@H]3[C@H]([C@@H]1CCC2=O)CC=C4[C@@]3(CC[C@@H](C4)OS(=O)(=O)O)C	↓		PC/H
HMDB0028890	Histidinyl-Lysine	HMDB0028890	435717	NA	NCCCCC(NC(=O)C(N)CC1=CN=CN1)C(O)=O	↑		PC/H
HMDB0002183	Docosahexaenoic acid	HMDB0002183	445580	C06429	CC/C=C\C/C=C\C/C=C\C/C=C\C/C=C\C/C=C\CCC(=O)O	↓		PC/H

## Sheet: Set2-CT_CPVsPancreaticcancer
Query	Match	HMDB	PubChem	KEGG	SMILES	Foldchange or levels	p-value	Ratio
HMDB0000148	L-Glutamic acid	HMDB0000148	33032	C00025	C(CC(=O)O)[C@@H](C(=O)O)N	1.08	0.0001	PC compared to H and CP
HMDB0000177	L-Histidine	HMDB0000177	6274	C00135	C1=C(NC=N1)C[C@@H](C(=O)O)N	0.878	0.0005	PC compared to H and CP
HMDB0000641	L-Glutamine	HMDB0000641	5961	C00064	C(CC(=O)N)[C@@H](C(=O)O)N	1.01	0.012	PC compared to H and CP
HMDB0000925	Trimethylamine N-oxide	HMDB0000925	1145	C01104	C[N+](C)(C)[O-]	1.07	0.022	PC compared to H and CP
HMDB0000187	L-Serine	HMDB0000187	5951	C00065	C([C@@H](C(=O)O)N)O	0.936	0.0019	PC compared to H and CP
HMDB0000192	L-Cystine	HMDB0000192	67678	C00491	C([C@@H](C(=O)O)N)SSC[C@@H](C(=O)O)N	0.788	0.018	PC compared to H and CP
HMDB0000517	L-Arginine	HMDB0000517	6322	C00062	C(C[C@@H](C(=O)O)N)CN=C(N)N	1.05	0.012	PC compared to H and CP
HMDB0000929	L-Tryptophan	HMDB0000929	6305	C00078	C1=CC=C2C(=C1)C(=CN2)C[C@@H](C(=O)O)N	0.9	0.044	PC compared to H and CP
HMDB0003073	Gamma-Linolenic acid	HMDB0003073	5280933	C06426	CCCCC/C=C\C/C=C\C/C=C\CCCCC(=O)O	↓		PC compared to H and CP
HMDB0000673	Linoleic acid	HMDB0000673	5280450	C01595	CCCCC/C=C\C/C=C\CCCCCCCC(=O)O	↓		PC compared to H and CP
HMDB0001043	Arachidonic acid	HMDB0001043	444899	C00219	CCCCC/C=C\C/C=C\C/C=C\C/C=C\CCCC(=O)O	↓		PC compared to H and CP
HMDB0002183	Docosahexaenoic acid	HMDB0002183	445580	C06429	CC/C=C\C/C=C\C/C=C\C/C=C\C/C=C\C/C=C\CCC(=O)O	↓		PC compared to H and CP
HMDB0006579	3-Sialyl Lewis	HMDB0006579	643993	NA	C[C@H]1[C@H]([C@H]([C@@H]([C@@H](O1)O[C@H]([C@@H](CO)O)[C@@H]([C@H](C=O)NC(=O)C)O[C@H]2[C@@H]([C@H]([C@H]([C@H](O2)CO)O)O[C@@]3(C[C@@H]([C@H]([C@@H](O3)[C@@H]([C@@H](CO)O)O)NC(=O)C)O)C(=O)O)O)O)O)O	↑		PC compared to H and CP

## Sheet: Set3_CPVsPancreaticcancer
Query	Match	HMDB	PubChem	KEGG	SMILES	Fold change or levels	p-value	Ratio
HMDB0010169	Sphingomyelin(d18:2, C17:0)	HMDB0010169	9939941	NA	[H][C@@](COP([O-])(=O)OCC[N+](C)(C)C)(NC(=O)CCCCCCCCCCCCCCC)[C@H](O)\C=C\CCCCCCCCCCCCC	1.15	0.0119	PC/Chronic pancreatitis
HMDB0008057	PC(18:0/22:6(4Z,7Z,10Z,13Z,16Z,19Z))	HMDB0008057	24778876	C00157	CCCCCCCCCCCCCCCCCC(=O)OC[C@H](COP(=O)([O-])OCC[N+](C)(C)C)OC(=O)CC/C=C\C/C=C\C/C=C\C/C=C\C/C=C\C/C=C\CC	1.06	0.2091	PC/Chronic pancreatitis
HMDB0001383	Sphinganine 1-phosphate	HMDB0001383	644260	C01120	CCCCCCCCCCCCCCC[C@H]([C@H](COP(=O)(O)O)N)O	0.85	0.0705	PC/Chronic pancreatitis
HMDB0004956	Ceramide (d18:1/24:0)	HMDB0004956	5283571	C00195	CCCCCCCCCCCCCCCCCCCCCCCC(=O)N[C@@H](CO)[C@@H](/C=C/CCCCCCCCCCCCC)O	0.8	0.0087	PC/Chronic pancreatitis
HMDB0000193	Isocitric acid	HMDB0000193	1198	C00311	C(C(C(C(=O)O)O)C(=O)O)C(=O)O	0.99	0.9159	PC/Chronic pancreatitis
HMDB0000243	Pyruvic acid	HMDB0000243	1060	C00022	CC(=O)C(=O)O	0.97	0.6479	PC/Chronic pancreatitis
HMDB0000162	L-Proline	HMDB0000162	145742	C00148	C1C[C@H](NC1)C(=O)O	0.75	0.0001	PC/Chronic pancreatitis
HMDB0000177	L-Histidine	HMDB0000177	6274	C00135	C1=C(NC=N1)C[C@@H](C(=O)O)N	0.79	0.0004	PC/Chronic pancreatitis
HMDB0006579	3-Sialyl Lewis	HMDB0006579	643993	NA	C[C@H]1[C@H]([C@H]([C@@H]([C@@H](O1)O[C@H]([C@@H](CO)O)[C@@H]([C@H](C=O)NC(=O)C)O[C@H]2[C@@H]([C@H]([C@H]([C@H](O2)CO)O)O[C@@]3(C[C@@H]([C@H]([C@@H](O3)[C@@H]([C@@H](CO)O)O)NC(=O)C)O)C(=O)O)O)O)O)O	14.27	3.17e-09	PC/Chronic pancreatitis
HMDB0000138	Glycocholic acid	HMDB0000138	23617285	C01921	C[C@H](CCC(=O)NCC(=O)O)[C@H]1CC[C@@H]2[C@@]1([C@H](C[C@H]3[C@H]2[C@@H](CC4[C@@]3(CC[C@H](C4)O)C)O)O)C	↑		PC/Chronic pancreatitis
HMDB0013161	2-Hexenoylcarnitine	HMDB0013161	53481638	NA	CCC/C=C/C(=O)OC(CC(=O)[O-])C[N+](C)(C)C	↑		PC/Chronic pancreatitis
HMDB0006344	Alpha-N-Phenylacetyl-L-glutamine	HMDB0006344	92258	C04148	C1=CC=C(C=C1)CC(=O)N[C@@H](CCC(=O)N)C(=O)O	↑		PC/Chronic pancreatitis
HMDB0006898	Chenodeoxyglycocholic acid	HMDB0006898	53477907	C05462	CC(CCC(=O)NCC(=O)O)C1CCC2[C@@]1(CCC3C2[C@@H](CC4[C@@]3(CC[C@H](C4)O)C)O)C	↑		PC/Chronic pancreatitis
HMDB0000064	Creatine	HMDB0000064	586	C00300	CN(CC(=O)O)C(=N)N	0.962	0.0008	PC/Chronic pancreatitis
HMDB0000128	Guanidoacetic acid	HMDB0000128	763	C00581	C(C(=O)O)N=C(N)N	0.609	0.02	PC/Chronic pancreatitis
HMDB0000641	L-Glutamine	HMDB0000641	5961	C00064	C(CC(=O)N)[C@@H](C(=O)O)N	1.64		PC/Chronic pancreatitis
HMDB0000097	Choline	HMDB0000097	305	C00114	C[N+](C)(C)CCO	0.85		PC/Chronic pancreatitis
HMDB0000043	Betaine	HMDB0000043	247	C00719	C[N+](C)(C)CC(=O)[O-]	0.84		PC/Chronic pancreatitis
HMDB0000190	L-Lactic acid	HMDB0000190	61503	C00186	C[C@@H](C(=O)O)O	↓		PC/Chronic pancreatitis
HMDB0000094	Citric acid	HMDB0000094	311	C00158	C(C(=O)O)C(CC(=O)O)(C(=O)O)O	↓		PC/Chronic pancreatitis
HMDB0000161	L-Alanine	HMDB0000161	5950	C00041	C[C@@H](C(=O)O)N	↓		PC/Chronic pancreatitis
HMDB0000172	L-Isoleucine	HMDB0000172	6306	C00407	CC[C@H](C)[C@@H](C(=O)O)N	↓		PC/Chronic pancreatitis
HMDB0000182	L-Lysine	HMDB0000182	5962	C00047	C(CCN)C[C@@H](C(=O)O)N	↓		PC/Chronic pancreatitis
HMDB0000883	L-Valine	HMDB0000883	6287	C00183	CC(C)[C@@H](C(=O)O)N	↓		PC/Chronic pancreatitis
HMDB0000087	Dimethylamine	HMDB0000087	674	C00543	CNC	↑		PC/Chronic pancreatitis
HMDB0001659	Acetone	HMDB0001659	180	C00207	CC(=O)C	↑		PC/Chronic pancreatitis
HMDB0000122	D-Glucose	HMDB0000122	5793	C00221	C([C@@H]1[C@H]([C@@H]([C@H](C(O1)O)O)O)O)O	↑		PC/Chronic pancreatitis
HMDB0000159	L-Phenylalanine	HMDB0000159	6140	C00079	C1=CC=C(C=C1)C[C@@H](C(=O)O)N	↑		PC/Chronic pancreatitis
HMDB0000142	Formic acid	HMDB0000142	284	C00058	C(=O)O	↑		PC/Chronic pancreatitis
HMDB0000169	D-Mannose	HMDB0000169	18950	C00936	C([C@@H]1[C@H]([C@@H]([C@@H](C(O1)O)O)O)O)O	↑		PC/Chronic pancreatitis
