# Supplementary material for: Integration of metabolites from meta-analysis with transcriptome reveals enhanced SPHK1 in PDAC with a background of pancreatitis
Source: BMC Cancer. 2022 Jul 19;22:792. doi: 10.1186/s12885-022-09816-6 (PMC9295503; doi:10.1186/s12885-022-09816-6)
Supplement: Supplementary file 5 — Additional file 5: Dataset S4. List of genes derived from relational databases. [file 12885_2022_9816_MOESM5_ESM.xlsx]

## Sheet: RAMP-metabolites-CP-PC-Networks
Input_Analyte	Input_CatalyzedBy_CommonName	Input_CatalyzedBy_SourceIds
Citrate	MIF	kegg:4282; uniprot:I4AY87; ensembl:ENSG00000240972
Citrate	MIF	entrez: entrez:4282; hmdb:HMDBP00100; uniprot:P14174
L-Glutamine	GFPT2	uniprot:A0A0S2Z4X9; ensembl:ENSG00000131459; kegg:9945; uniprot:B3KMR8
L-Glutamine	GFPT2	hmdb:HMDBP00214; uniprot:O94808
D-Mannose	CPD	uniprot:O75976; hmdb:HMDBP10017
D-Mannose	MAN2A1	uniprot:Q16706; hmdb:HMDBP00867
D-Mannose	MAN2A1	ensembl:ENSG00000112893; kegg:4124
L-Proline	EGLN3	hmdb:HMDBP09212; uniprot:Q9H6Z9
L-Proline	EGLN3	ensembl:ENSG00000129521; kegg:112399
Choline	PHOSPHO1	uniprot:Q8TCT1; hmdb:HMDBP03097
Choline	PHOSPHO1	ensembl:ENSG00000173868; kegg:162466
L-Alanine	PGLYRP1	uniprot:O75594; hmdb:HMDBP02049
Pyruvate	ADCY1	hmdb:HMDBP00711; entrez: entrez:107; uniprot:Q08828
Pyruvate	ADCY1	ensembl:ENSG00000164742; kegg:107
Isocitrate	IDH1	entrez: entrez:3417; hmdb:HMDBP00898; uniprot:O75874
Isocitrate	IDH1	uniprot:V9HWJ2; kegg:3417; ensembl:ENSG00000138413
Sphingomyelin	PIGY	ensembl:ENSG00000255072; kegg:84992
Sphingomyelin	PIGY	uniprot:Q3MUY2; hmdb:HMDBP07334
Ceramide	PIGY	ensembl:ENSG00000255072; kegg:84992
Ceramide	PIGY	uniprot:Q3MUY2; hmdb:HMDBP07334
Sphinganine	PIGY	ensembl:ENSG00000255072; kegg:84992
Sphinganine	PIGY	uniprot:Q3MUY2; hmdb:HMDBP07334
Pyruvate	TST	uniprot:Q16762; hmdb:HMDBP01056
Pyruvate	TST	kegg:7263; ensembl:ENSG00000128311
L-Histidine	PRMT3	hmdb:HMDBP00474; uniprot:O60678
D-Mannose	HK1	hmdb:HMDBP00215; uniprot:P19367; entrez: entrez:3098
D-Mannose	HK1	uniprot:B3KXY9; uniprot:A8K7J7; kegg:3098; uniprot:Q59FD4; ensembl:ENSG00000156515
D-Glucose	HK1	hmdb:HMDBP00215; uniprot:P19367; entrez: entrez:3098
D-Glucose	HK1	uniprot:B3KXY9; uniprot:A8K7J7; kegg:3098; uniprot:Q59FD4; ensembl:ENSG00000156515
Dimethylamine	MAOB	uniprot:P27338; hmdb:HMDBP00161; entrez: entrez:4129
Dimethylamine	MAOB	ensembl:ENSG00000069535; kegg:4129
Formicacid	ESD	hmdb:HMDBP00501; uniprot:P10768
Citrate	CTDSP1	hmdb:HMDBP09429; uniprot:Q9GZU7
Citrate	ACLY	hmdb:HMDBP00010; entrez: entrez:47; uniprot:P53396
Citrate	ACLY	ensembl:ENSG00000131473; kegg:47; uniprot:A0A024R1T9
Pyruvate	SLC16A4	hmdb:HMDBP01114; uniprot:O15374
L-Alanine	PGLYRP3	hmdb:HMDBP09366; uniprot:Q96LB9
Sphinganine	SGPP1	kegg:81537; ensembl:ENSG00000126821
Sphinganine	SGPP1	uniprot:Q9BX95; hmdb:HMDBP11951
D-Glucose	LALBA	uniprot:A0A080YV01; ensembl:ENSG00000167531; kegg:3906
D-Glucose	LALBA	hmdb:HMDBP00372; uniprot:P00709
D-Mannose	GUSB	ensembl:ENSG00000169919; kegg:2990
D-Mannose	GUSB	uniprot:P08236; hmdb:HMDBP00839
Glycocholicacid	GLYAT	kegg:10249; ensembl:ENSG00000149124
Glycocholicacid	GLYAT	uniprot:Q6IB77; hmdb:HMDBP07349
L-Phenylalanine	GLYAT	kegg:10249; ensembl:ENSG00000149124
L-Phenylalanine	GLYAT	uniprot:Q6IB77; hmdb:HMDBP07349
L-Glutamine	KYAT1	kegg:883; ensembl:ENSG00000171097; uniprot:A8K563
L-Glutamine	CCBL1	hmdb:HMDBP00464; uniprot:Q16773
L-Phenylalanine	KYAT1	kegg:883; ensembl:ENSG00000171097; uniprot:A8K563
L-Phenylalanine	CCBL1	hmdb:HMDBP00464; uniprot:Q16773
Pyruvate	KYAT1	kegg:883; ensembl:ENSG00000171097; uniprot:A8K563
Pyruvate	CCBL1	hmdb:HMDBP00464; uniprot:Q16773
Formicacid	CYP2F1	uniprot:P24903; hmdb:HMDBP01551; entrez: entrez:1572
Formicacid	CYP2F1	kegg:1572; ensembl:ENSG00000197446
D-Mannose	NOS1	uniprot:A0PJJ7; ensembl:ENSG00000089250; kegg:4842; uniprot:B4DG68; uniprot:A0PJJ7
D-Mannose	NOS1	entrez: entrez:4842; uniprot:P29475; hmdb:HMDBP00928; entrez: entrez:4842; uniprot:P29475; hmdb:HMDBP00928
Phosphatidylcholine	ATP8A1	hmdb:HMDBP01359; uniprot:Q9Y2Q0
Sphingomyelin	PIGF	hmdb:HMDBP07326; uniprot:Q07326; entrez: entrez:5281
Sphingomyelin	PIGF	kegg:5281; ensembl:ENSG00000151665; uniprot:Q6IB04;
Ceramide	PIGF	hmdb:HMDBP07326; uniprot:Q07326; entrez: entrez:5281
Ceramide	PIGF	kegg:5281; ensembl:ENSG00000151665; uniprot:Q6IB04
Sphinganine	PIGF	hmdb:HMDBP07326; uniprot:Q07326; entrez: entrez:5281
Sphinganine	PIGF	kegg:5281; ensembl:ENSG00000151665; uniprot:Q6IB04
L-Proline	P4HA1	uniprot:Q5VSQ6; ensembl:ENSG00000122884; kegg:5033
L-Proline	P4HA1	hmdb:HMDBP00304; uniprot:P13674
Formicacid	CYP51A1	entrez: entrez:1595; hmdb:HMDBP00265; uniprot:Q16850
Formicacid	CYP51A1	kegg:1595; ensembl:ENSG00000001630; uniprot:A0A0C4DFL7
L-Lysine	SETD2	uniprot:Q9BYW2; hmdb:HMDBP09035
L-Lysine	SETD2	kegg:29072; ensembl:ENSG00000181555
L-Phenylalanine	TAT	uniprot:P17735; hmdb:HMDBP00277
L-Phenylalanine	TAT	uniprot:A0A140VKB7; kegg:6898; ensembl:ENSG00000198650
Formicacid	MTHFD1	kegg:4522; ensembl:ENSG00000100714
Formicacid	MTHFD1	hmdb:HMDBP00923; uniprot:P11586; entrez: entrez:4522
D-Glucose	G6PC	ensembl:ENSG00000131482; kegg:2538
D-Glucose	G6PC	hmdb:HMDBP00376; uniprot:P35575; entrez: entrez:2538
L-Lacticacid	HAGHL	hmdb:HMDBP05976; uniprot:Q6PII5
D-Mannose	SIGLEC7	hmdb:HMDBP02570; uniprot:Q9Y286
L-Proline	PPIG	uniprot:Q13427; hmdb:HMDBP10693
L-Glutamine	PPAT	uniprot:A8K4H7; uniprot:Q59G63; kegg:5471; ensembl:ENSG00000128059
L-Glutamine	PPAT	hmdb:HMDBP00331; entrez: entrez:5471; uniprot:Q06203
Dimethylamine	DDAH2	hmdb:HMDBP00768; uniprot:O95865
L-Valine	PCCB	uniprot:P05166; hmdb:HMDBP00258
L-Valine	PCCB	kegg:5096; ensembl:ENSG00000114054
Ceramide	GALC	hmdb:HMDBP00315; uniprot:P54803
Ceramide	GALC	uniprot:A0A0A0MQV0; ensembl:ENSG00000054983; kegg:2581
Ceramide	SGMS2	uniprot:Q8NHU3; hmdb:HMDBP00770
Ceramide	SGMS2	ensembl:ENSG00000164023; uniprot:A0A024RDH4; kegg:166929
Sphingomyelin	SGMS2	uniprot:Q8NHU3; hmdb:HMDBP00770
Sphingomyelin	SGMS2	ensembl:ENSG00000164023; uniprot:A0A024RDH4; kegg:166929
Sphingomyelin	B3GALT5	kegg:10317; ensembl:ENSG00000183778
Sphingomyelin	B3GALT5	hmdb:HMDBP06939; uniprot:Q9Y2C3
Ceramide	B3GALT5	kegg:10317; ensembl:ENSG00000183778
Ceramide	B3GALT5	hmdb:HMDBP06939; uniprot:Q9Y2C3
Sphinganine	B3GALT5	kegg:10317; ensembl:ENSG00000183778
Sphinganine	B3GALT5	hmdb:HMDBP06939; uniprot:Q9Y2C3
L-Glutamine	TGM7	hmdb:HMDBP00693; uniprot:Q96PF1
D-Mannose	PLA2G1B	ensembl:ENSG00000170890; kegg:5319
D-Mannose	PLA2G1B	uniprot:P04054; hmdb:HMDBP00061
Ceramide	PPAP2A	uniprot:O14494; entrez: entrez:8611; hmdb:HMDBP00237
Ceramide	PLPP1	kegg:8611; ensembl:ENSG00000067113; uniprot:A0A024QZS3
Sphinganine	PPAP2A	uniprot:O14494; entrez: entrez:8611; hmdb:HMDBP00237
Sphinganine	PLPP1	kegg:8611; ensembl:ENSG00000067113; uniprot:A0A024QZS3
Pyruvate	ME3	ensembl:ENSG00000151376; kegg:10873; uniprot:Q6TCH8
Pyruvate	ME3	hmdb:HMDBP00859; uniprot:Q16798; hmdb:HMDBP07411; uniprot:Q8TBJ0
L-Glutamine	PIG59	hmdb:HMDBP07381; uniprot:A8YXX4
Pyruvate	HOGA1	ensembl:ENSG00000241935; kegg:112817
Pyruvate	HOGA1	hmdb:HMDBP11784; uniprot:Q86XE5
L-Histidine	CNDP1	kegg:84735; ensembl:ENSG00000150656
L-Histidine	CNDP1	hmdb:HMDBP00473; uniprot:Q96KN2
Citrate	CNDP1	kegg:84735; ensembl:ENSG00000150656
Citrate	CNDP1	hmdb:HMDBP00473; uniprot:Q96KN2
L-Lysine	SETDB1	kegg:9869; ensembl:ENSG00000143379
L-Lysine	SETDB1	uniprot:Q15047; hmdb:HMDBP00411
Sphingomyelin	SMPD1	ensembl:ENSG00000166311; uniprot:Q59EN6; kegg:6609
Sphingomyelin	SMPD1	uniprot:P17405; hmdb:HMDBP00776; entrez: entrez:6609
Ceramide	SMPD1	ensembl:ENSG00000166311; uniprot:Q59EN6; kegg:6609
Ceramide	SMPD1	uniprot:P17405; hmdb:HMDBP00776; entrez: entrez:6609
Sphingomyelin	SMPD4	kegg:55627; ensembl:ENSG00000136699; uniprot:H7BXF4
Sphingomyelin	SMPD4	hmdb:HMDBP08771; uniprot:Q9NXE4
Ceramide	SMPD4	kegg:55627; ensembl:ENSG00000136699; uniprot:H7BXF4
Ceramide	SMPD4	hmdb:HMDBP08771; uniprot:Q9NXE4
Phosphatidylcholine	SMPD4	kegg:55627; ensembl:ENSG00000136699; uniprot:H7BXF4
Phosphatidylcholine	SMPD4	hmdb:HMDBP08771; uniprot:Q9NXE4
Citrate	APRT	hmdb:HMDBP00438; uniprot:P07741
Citrate	APRT	ensembl:ENSG00000198931; kegg:353
L-Proline	SLC6A14	uniprot:Q9UN76; hmdb:HMDBP03302
Carnitine	SLC25A20	hmdb:HMDBP02794; uniprot:O43772
Choline	PLD6	uniprot:Q8N2A8; hmdb:HMDBP10645
L-Valine	BCAT2	kegg:587; ensembl:ENSG00000105552
L-Valine	BCAT2	hmdb:HMDBP00516; uniprot:O15382
L-Isoleucine	BCAT2	kegg:587; ensembl:ENSG00000105552
L-Isoleucine	BCAT2	hmdb:HMDBP00516; uniprot:O15382
L-Alanine	NFS1	uniprot:Q53FP3; ensembl:ENSG00000244005; kegg:9054
L-Alanine	NFS1	hmdb:HMDBP02513; uniprot:Q9Y697
Pyruvate	SLC16A2	uniprot:P36021; hmdb:HMDBP01112; entrez: entrez:6567
Pyruvate	SLC16A2	ensembl:ENSG00000147100; kegg:6567
Betaine	CHDH	ensembl:ENSG00000016391; kegg:55349
Betaine	CHDH	uniprot:Q8NE62; hmdb:HMDBP00201
Choline	CHDH	ensembl:ENSG00000016391; kegg:55349
Choline	CHDH	uniprot:Q8NE62; hmdb:HMDBP00201
Pyruvate	ABAT	hmdb:HMDBP00248; entrez: entrez:18; uniprot:P80404
Pyruvate	ABAT	ensembl:ENSG00000183044; uniprot:X5D8S1; kegg:18
L-Alanine	ABAT	hmdb:HMDBP00248; entrez: entrez:18; uniprot:P80404
L-Alanine	ABAT	ensembl:ENSG00000183044; uniprot:X5D8S1; kegg:18
L-Lysine	EHMT1	ensembl:ENSG00000181090; kegg:79813
L-Lysine	EHMT1	uniprot:Q9H9B1; hmdb:HMDBP00425
D-Glucose	MGAM	kegg:8972; ensembl:ENSG00000257335
D-Glucose	MGAM	hmdb:HMDBP03069; uniprot:O43451
D-Mannose	MAN1C1	uniprot:Q9NR34; hmdb:HMDBP05478
D-Mannose	MAN1C1	kegg:57134; uniprot:Q59G34; ensembl:ENSG00000117643
Ceramide	GBA	kegg:2629; uniprot:A0A068F658; ensembl:ENSG00000177628
Ceramide	GBA	uniprot:P04062; entrez: entrez:2629; hmdb:HMDBP01795
D-Glucose	GBA	kegg:2629; uniprot:A0A068F658; ensembl:ENSG00000177628
D-Glucose	GBA	uniprot:P04062; entrez: entrez:2629; hmdb:HMDBP01795
L-Histidine	HARS2	kegg:23438; ensembl:ENSG00000112855
L-Histidine	HARS2	uniprot:P49590; hmdb:HMDBP00642
L-Lysine	KDM2A	uniprot:Q9Y2K7; hmdb:HMDBP09184
Sphingomyelin	PIGA	hmdb:HMDBP00941; uniprot:P37287
Sphingomyelin	PIGA	kegg:5277; ensembl:ENSG00000165195
Ceramide	PIGA	hmdb:HMDBP00941; uniprot:P37287
Ceramide	PIGA	kegg:5277; ensembl:ENSG00000165195
Sphinganine	PIGA	hmdb:HMDBP00941; uniprot:P37287
Sphinganine	PIGA	kegg:5277; ensembl:ENSG00000165195
Carnitine	BBOX1	hmdb:HMDBP00382; uniprot:O75936
Carnitine	BBOX1	kegg:8424; ensembl:ENSG00000129151
L-Lysine	PLOD1	hmdb:HMDBP00460; uniprot:Q02809
L-Lysine	PLOD1	ensembl:ENSG00000083444; uniprot:A0A024R4H0; kegg:5351
D-Mannose	APOH	kegg:350; ensembl:ENSG00000091583
D-Mannose	APOH	uniprot:P02749; hmdb:HMDBP01717
Sphingomyelin	PLCD3	kegg:113026; ensembl:ENSG00000161714
Sphingomyelin	PLCD3	hmdb:HMDBP04457; uniprot:Q8N3E9
Ceramide	PIGN	ensembl:ENSG00000197563; kegg:23556; uniprot:A0A024R2C3
Ceramide	PIGN	uniprot:O95427; hmdb:HMDBP07328
Sphingomyelin	PIGN	ensembl:ENSG00000197563; kegg:23556; uniprot:A0A024R2C3
Sphingomyelin	PIGN	uniprot:O95427; hmdb:HMDBP07328
Sphinganine	PIGN	ensembl:ENSG00000197563; kegg:23556; uniprot:A0A024R2C3
Sphinganine	PIGN	uniprot:O95427; hmdb:HMDBP07328
Citrate	RNASE1	uniprot:P07998; hmdb:HMDBP00457
Ceramide	ACER2	ensembl:ENSG00000177076; uniprot:B3KVV5; kegg:340485
Ceramide	ACER2	hmdb:HMDBP09163; uniprot:Q5QJU3
Sphinganine	ACER2	ensembl:ENSG00000177076; uniprot:B3KVV5; kegg:340485
Sphinganine	ACER2	hmdb:HMDBP09163; uniprot:Q5QJU3
Phosphatidylcholine	PRKCA	entrez: entrez:5578; uniprot:P17252; hmdb:HMDBP01180
Phosphatidylcholine	PRKCA	ensembl:ENSG00000154229; kegg:5578
Formicacid	CYP19A1	uniprot:A0A024R5S8; ensembl:ENSG00000137869; kegg:1588; uniprot:Q8TCA4; uniprot:Q8IYG4
Formicacid	CYP19A1	uniprot:P11511; hmdb:HMDBP01561; entrez: entrez:1588
Citrate	CLYBL	uniprot:Q8N0X4; hmdb:HMDBP06047
L-Glutamine	GFPT1	kegg:2673; ensembl:ENSG00000198380
L-Glutamine	GFPT1	hmdb:HMDBP00216; uniprot:Q06210
L-Proline	EGLN2	kegg:112398; ensembl:ENSG00000269858; uniprot:A0A024R0R2
L-Proline	EGLN2	hmdb:HMDBP09211; uniprot:Q96KS0; entrez: entrez:112398
Choline	PLD2	kegg:5338; ensembl:ENSG00000129219
Choline	PLD2	uniprot:O14939; hmdb:HMDBP00080; entrez: entrez:5338
L-Proline	PYCR3	kegg:65263; uniprot:B4DGI7; ensembl:ENSG00000104524
L-Proline	PYCRL	entrez: entrez:65263; hmdb:HMDBP02972; uniprot:Q53H96
Creatine	PRRX1	uniprot:P54821; hmdb:HMDBP10739
Carnitine	SLC25A29	hmdb:HMDBP10761; uniprot:Q8N8R3
D-Glucose	GAA	hmdb:HMDBP01817; uniprot:P10253
D-Glucose	GAA	kegg:2548; ensembl:ENSG00000171298
L-Histidine	DDC	kegg:1644; ensembl:ENSG00000132437
L-Histidine	DDC	entrez: entrez:1644; uniprot:P20711; hmdb:HMDBP00278
L-Phenylalanine	DDC	kegg:1644; ensembl:ENSG00000132437
L-Phenylalanine	DDC	entrez: entrez:1644; uniprot:P20711; hmdb:HMDBP00278
D-Mannose	SERPIND1	uniprot:P05546; entrez: entrez:3053; hmdb:HMDBP01712
D-Mannose	SERPIND1	ensembl:ENSG00000099937; kegg:3053; uniprot:Q8IVC0
Choline	ADH7	uniprot:P40394; entrez: entrez:131; hmdb:HMDBP00783
Choline	ADH7	ensembl:ENSG00000196344; kegg:131
Carnitine	CES1	kegg:1066; ensembl:ENSG00000198848
Carnitine	CES1	entrez: entrez:1066; uniprot:P23141; hmdb:HMDBP00497
D-Mannose	CES1	kegg:1066; ensembl:ENSG00000198848
D-Mannose	CES1	entrez: entrez:1066; uniprot:P23141; hmdb:HMDBP00497
L-Proline	SLC6A7	hmdb:HMDBP03259; uniprot:Q99884
L-Glutamine	CAD	kegg:790; ensembl:ENSG00000084774
L-Glutamine	CAD	uniprot:P27708; entrez: entrez:790; hmdb:HMDBP03298
Carnitine	CRAT	uniprot:P43155; hmdb:HMDBP00028
Phosphatidylcholine	PISD	ensembl:ENSG00000241878; kegg:23761
Phosphatidylcholine	PISD	hmdb:HMDBP02255; uniprot:Q9UG56
Pyruvate	PISD	ensembl:ENSG00000241878; kegg:23761
Pyruvate	PISD	hmdb:HMDBP02255; uniprot:Q9UG56
Betaine	SLC6A12	hmdb:HMDBP02695; uniprot:P48065
Dimethylamine	DDAH1	uniprot:O94760; hmdb:HMDBP00767
Sphingomyelin	SGMS1	ensembl:ENSG00000198964; uniprot:D3DWC4; kegg:259230
Sphingomyelin	SGMS1	uniprot:Q86VZ5; hmdb:HMDBP00775
Ceramide	SGMS1	ensembl:ENSG00000198964; uniprot:D3DWC4; kegg:259230
Ceramide	SGMS1	uniprot:Q86VZ5; hmdb:HMDBP00775
Pyruvate	ME1	hmdb:HMDBP00857; uniprot:P48163
Pyruvate	ME1	kegg:4199; ensembl:ENSG00000065833
Sphingomyelin	PIGW	ensembl:ENSG00000277161; kegg:284098
Sphingomyelin	PIGW	uniprot:Q7Z7B1; hmdb:HMDBP02977
Ceramide	PIGW	ensembl:ENSG00000277161; kegg:284098
Ceramide	PIGW	uniprot:Q7Z7B1; hmdb:HMDBP02977
Sphinganine	PIGW	ensembl:ENSG00000277161; kegg:284098
Sphinganine	PIGW	uniprot:Q7Z7B1; hmdb:HMDBP02977
Citrate	ACO2	uniprot:Q99798; entrez: entrez:50; hmdb:HMDBP00725
Citrate	ACO2	kegg:50; ensembl:ENSG00000100412
Isocitrate	ACO2	uniprot:Q99798; entrez: entrez:50; hmdb:HMDBP00725
Isocitrate	ACO2	kegg:50; ensembl:ENSG00000100412
Formicacid	CYP1A1	uniprot:A0N0X8; hmdb:HMDBP07417
Sphingomyelin	PIGQ	uniprot:Q9BRB3; hmdb:HMDBP00940
Sphingomyelin	PIGQ	ensembl:ENSG00000007541; kegg:9091
Ceramide	PIGQ	uniprot:Q9BRB3; hmdb:HMDBP00940
Ceramide	PIGQ	ensembl:ENSG00000007541; kegg:9091
Sphinganine	PIGQ	uniprot:Q9BRB3; hmdb:HMDBP00940
Sphinganine	PIGQ	ensembl:ENSG00000007541; kegg:9091
L-Lysine	KDM2B	hmdb:HMDBP09185; uniprot:Q8NHM5
D-Mannose	AMY2B	hmdb:HMDBP02146; uniprot:P19961
D-Mannose	AMY2B	kegg:280; ensembl:ENSG00000240038
L-Lacticacid	LDHD	hmdb:HMDBP03582; uniprot:Q86WU2
L-Lacticacid	LDHD	ensembl:ENSG00000166816; kegg:197257
Pyruvate	LDHD	hmdb:HMDBP03582; uniprot:Q86WU2
Pyruvate	LDHD	ensembl:ENSG00000166816; kegg:197257
L-Glutamine	TGM3	hmdb:HMDBP00665; uniprot:Q08188
Ceramide	PIGG	ensembl:ENSG00000174227; kegg:54872
Ceramide	PIGG	uniprot:Q5H8A4; hmdb:HMDBP07327
Sphingomyelin	PIGG	ensembl:ENSG00000174227; kegg:54872
Sphingomyelin	PIGG	uniprot:Q5H8A4; hmdb:HMDBP07327
Sphinganine	PIGG	ensembl:ENSG00000174227; kegg:54872
Sphinganine	PIGG	uniprot:Q5H8A4; hmdb:HMDBP07327
Choline	CHAT	kegg:1103; ensembl:ENSG00000070748
Choline	CHAT	uniprot:P28329; entrez: entrez:1103; hmdb:HMDBP00025
L-Glutamine	GLS2	hmdb:HMDBP00675; uniprot:Q9UI32
L-Glutamine	GLS2	ensembl:ENSG00000135423; kegg:27165
Sphingomyelin	CD1A	uniprot:P06126; hmdb:HMDBP11443
Sphingomyelin	CD1A	ensembl:ENSG00000158477; kegg:909
Ceramide	CD1A	uniprot:P06126; hmdb:HMDBP11443
Ceramide	CD1A	ensembl:ENSG00000158477; kegg:909
Sphinganine	CD1A	uniprot:P06126; hmdb:HMDBP11443
Sphinganine	CD1A	ensembl:ENSG00000158477; kegg:909
L-Proline	LAP3	hmdb:HMDBP00865; uniprot:P28838
L-Proline	LAP3	kegg:51056; ensembl:ENSG00000002549
L-Valine	BCAT1	kegg:586; ensembl:ENSG00000060982; uniprot:A0A024RAV0
L-Valine	BCAT1	uniprot:P54687; hmdb:HMDBP00301
L-Isoleucine	BCAT1	kegg:586; ensembl:ENSG00000060982; uniprot:A0A024RAV0
L-Isoleucine	BCAT1	uniprot:P54687; hmdb:HMDBP00301
L-Proline	PROSC	uniprot:O94903; hmdb:HMDBP03037
Formicacid	AFMID	ensembl:ENSG00000183077; kegg:125061
Formicacid	AFMID	hmdb:HMDBP07392; entrez: entrez:125061; uniprot:Q63HM1
D-Mannose	ACPP	hmdb:HMDBP00098; uniprot:P15309
L-Alanine	SLC1A4	hmdb:HMDBP03110; uniprot:P43007
L-Proline	PPIH	ensembl:ENSG00000171960; uniprot:Q6FH36; kegg:10465
L-Proline	PPIH	uniprot:O43447; hmdb:HMDBP10695
Formicacid	MTHFD1L	uniprot:Q6UB35; hmdb:HMDBP07378; entrez: entrez:25902
Formicacid	MTHFD1L	ensembl:ENSG00000120254; kegg:25902
L-Isoleucine	IARS	uniprot:Q6P0M4; uniprot:Q7L4K8; ensembl:ENSG00000196305; kegg:3376
L-Isoleucine	IARS	uniprot:P41252; hmdb:HMDBP00614
Isocitrate	ACO1	kegg:48; uniprot:Q9HBB2; uniprot:V9HWB7; ensembl:ENSG00000122729
Isocitrate	ACO1	hmdb:HMDBP00726; uniprot:P21399; hmdb:HMDBP00726; uniprot:P21399
Citrate	ACO1	kegg:48; uniprot:Q9HBB2; uniprot:V9HWB7; ensembl:ENSG00000122729
Citrate	ACO1	hmdb:HMDBP00726; uniprot:P21399; hmdb:HMDBP00726; uniprot:P21399
Formicacid	ACY3	uniprot:Q96HD9; hmdb:HMDBP00558
Sphingomyelin	SAMD8	hmdb:HMDBP10983; uniprot:Q96LT4
Formicacid	CYP2C9	ensembl:ENSG00000138109; uniprot:S5RV20; kegg:1559
Formicacid	CYP2C9	entrez: entrez:1559; hmdb:HMDBP01036; uniprot:P11712
Sphingomyelin	CD1B	ensembl:ENSG00000158485; kegg:910
Sphingomyelin	CD1B	hmdb:HMDBP11448; uniprot:P29016
Ceramide	CD1B	ensembl:ENSG00000158485; kegg:910
Ceramide	CD1B	hmdb:HMDBP11448; uniprot:P29016
Sphinganine	CD1B	ensembl:ENSG00000158485; kegg:910
Sphinganine	CD1B	hmdb:HMDBP11448; uniprot:P29016
Sphingomyelin	GM2-activator	entrez: entrez:2760
Sphingomyelin	GM2A	hmdb:HMDBP01719; uniprot:P17900
Sphingomyelin	GM2A	kegg:2760; ensembl:ENSG00000196743
Ceramide	GM2-activator	entrez: entrez:2760
Ceramide	GM2A	hmdb:HMDBP01719; uniprot:P17900
Ceramide	GM2A	kegg:2760; ensembl:ENSG00000196743
Sphinganine	GM2-activator	entrez: entrez:2760
Sphinganine	GM2A	hmdb:HMDBP01719; uniprot:P17900
Sphinganine	GM2A	kegg:2760; ensembl:ENSG00000196743
L-Lysine	AASS	ensembl:ENSG00000008311; kegg:10157
L-Lysine	AASS	uniprot:Q9UDR5; hmdb:HMDBP00852
L-Lysine	PLOD2	hmdb:HMDBP00461; uniprot:O00469
L-Lysine	PLOD2	ensembl:ENSG00000152952; kegg:5352
Formicacid	CYP3A43	kegg:64816; ensembl:ENSG00000021461
Formicacid	CYP3A43	uniprot:Q9HB55; hmdb:HMDBP01546
Pyruvate	GPT2	ensembl:ENSG00000166123; uniprot:A0A024R6R2; kegg:84706
Pyruvate	GPT2	uniprot:Q8TD30; hmdb:HMDBP03670
L-Alanine	GPT2	ensembl:ENSG00000166123; uniprot:A0A024R6R2; kegg:84706
L-Alanine	GPT2	uniprot:Q8TD30; hmdb:HMDBP03670
Choline	PCYT1B	hmdb:HMDBP00732; uniprot:Q9Y5K3
Choline	PCYT1B	kegg:9468; ensembl:ENSG00000102230
Pyruvate	PDHA2	entrez: entrez:5161; uniprot:P29803; hmdb:HMDBP00050
Pyruvate	PDHA2	ensembl:ENSG00000163114; kegg:5161
Pyruvate	SDSL	ensembl:ENSG00000139410; kegg:113675; uniprot:A0A024RBL2
Pyruvate	SDSL	hmdb:HMDBP08972; uniprot:Q96GA7
Formicacid	ASPA	hmdb:HMDBP00555; uniprot:P45381; entrez: entrez:443
Formicacid	ASPA	ensembl:ENSG00000108381; uniprot:Q6FH48; kegg:443
Pyruvate	ILVBL	hmdb:HMDBP07364; uniprot:A1L0T0
Isocitrate	IDH3A	entrez: entrez:3419; uniprot:P50213; hmdb:HMDBP00899
Isocitrate	IDH3A	kegg:3419; ensembl:ENSG00000166411
L-Phenylalanine	FARSB	uniprot:Q9NSD9; hmdb:HMDBP00522
L-Phenylalanine	FARSB	kegg:10056; ensembl:ENSG00000116120
Sphingomyelin	PIGM	ensembl:ENSG00000143315; kegg:93183
Sphingomyelin	PIGM	uniprot:Q9H3S5; hmdb:HMDBP02955
Sphinganine	PIGM	ensembl:ENSG00000143315; kegg:93183
Sphinganine	PIGM	uniprot:Q9H3S5; hmdb:HMDBP02955
Ceramide	PIGM	ensembl:ENSG00000143315; kegg:93183
Ceramide	PIGM	uniprot:Q9H3S5; hmdb:HMDBP02955
Citrate	PDE5A	uniprot:O76074; hmdb:HMDBP00655
Citrate	PDE5A	ensembl:ENSG00000138735; kegg:8654
Pyruvate	DAO	uniprot:P14920; hmdb:HMDBP00206
Pyruvate	DAO	uniprot:A0A024RBI1; ensembl:ENSG00000110887; kegg:1610
Ceramide	COL4A3BP	uniprot:Q9Y5P4; hmdb:HMDBP01298
Pyruvate	FAHD1	ensembl:ENSG00000180185; kegg:81889
Pyruvate	FAHD1	hmdb:HMDBP07677; uniprot:Q6P587
L-Valine	VARS2	uniprot:B4E0K6; kegg:57176; uniprot:B4DG77; ensembl:ENSG00000137411
L-Valine	VARS2	hmdb:HMDBP07421; uniprot:Q5ST30
D-Mannose	RHO	kegg:6010; ensembl:ENSG00000163914
D-Mannose	RHO	hmdb:HMDBP02100; uniprot:P08100
Formicacid	PDF	hmdb:HMDBP01117; uniprot:Q9HBH1
D-Mannose	MAN2A2	kegg:4122; ensembl:ENSG00000196547
D-Mannose	MAN2A2	hmdb:HMDBP11809; uniprot:P49641
D-Glucose	B4GALT1	ensembl:ENSG00000086062; kegg:2683
D-Glucose	B4GALT1	hmdb:HMDBP00377; uniprot:P15291
Ceramide	UGCG	ensembl:ENSG00000148154; kegg:7357; uniprot:A0A024R157
Ceramide	UGCG	uniprot:Q16739; hmdb:HMDBP00845
L-Isoleucine	ACADSB	ensembl:ENSG00000196177; kegg:36; uniprot:A0A0S2Z3P9
L-Isoleucine	ACADSB	hmdb:HMDBP01613; uniprot:P45954
Ceramide	KLRB1	kegg:3820; ensembl:ENSG00000111796
Ceramide	KLRB1	hmdb:HMDBP10742; uniprot:Q12918
Ceramide	ASAH2C	uniprot:P0C7U2; hmdb:HMDBP09162
Choline	ACHE	hmdb:HMDBP00524; entrez: entrez:43; uniprot:P22303
Choline	ACHE	ensembl:ENSG00000087085; kegg:43
Choline	GDE1	hmdb:HMDBP07388; uniprot:Q9NZC3
Carnitine	SLCO1B1	uniprot:Q9Y6L6; entrez: entrez:10599; hmdb:HMDBP00454
Carnitine	SLCO1B1	kegg:10599; uniprot:Q05CV5; ensembl:ENSG00000134538; uniprot:A0A024RAU7
Citrate	ITPA	kegg:3704; uniprot:A0A0S2Z3W7; ensembl:ENSG00000125877
Citrate	ITPA	uniprot:Q9BY32; hmdb:HMDBP00431
Formicacid	CYP4Z1	uniprot:Q86W10; hmdb:HMDBP01559
Pyruvate	PDHA1	uniprot:P08559; hmdb:HMDBP00046; entrez: entrez:5160
Pyruvate	PDHA1	kegg:5160; uniprot:A0A024RBX9; ensembl:ENSG00000131828
Choline	NA	uniprot:Q59EA4; hmdb:HMDBP09354
D-Mannose	MBL2	hmdb:HMDBP02647; uniprot:P11226
D-Mannose	MBL2	kegg:4153; ensembl:ENSG00000165471
L-Proline	LEPREL2	hmdb:HMDBP08683; uniprot:Q8IVL6
D-Mannose	CSF2RB	uniprot:Q6NSJ8; ensembl:ENSG00000100368; kegg:1439
D-Mannose	CSF2RB	entrez: entrez:1439; hmdb:HMDBP01696; uniprot:P32927
L-Proline	PRODH2	hmdb:HMDBP05360; uniprot:Q9UF12
L-Proline	PRODH2	kegg:58510; ensembl:ENSG00000250799
Choline	ADH5	kegg:128; uniprot:Q6IRT1; ensembl:ENSG00000197894
Choline	ADH5	uniprot:P11766; hmdb:HMDBP00780
Pyruvate	DLAT	uniprot:P10515; entrez: entrez:1737; hmdb:HMDBP00055
Pyruvate	DLAT	kegg:1737; ensembl:ENSG00000150768
Sphinganine	CERS2	uniprot:Q96G23; hmdb:HMDBP11630
Sphinganine	CerS2	entrez: entrez:29956
Sphinganine	CERS2	ensembl:ENSG00000143418; kegg:29956
Pyruvate	PDHB	ensembl:ENSG00000168291; kegg:5162
Pyruvate	PDHB	hmdb:HMDBP00012; uniprot:P11177; entrez: entrez:5162
L-Valine	SLC16A10	kegg:117247; ensembl:ENSG00000112394
L-Valine	SLC16A10	hmdb:HMDBP05340; uniprot:Q8TF71
L-Proline	SLC16A10	kegg:117247; ensembl:ENSG00000112394
L-Proline	SLC16A10	hmdb:HMDBP05340; uniprot:Q8TF71
L-Isoleucine	SLC16A10	kegg:117247; ensembl:ENSG00000112394
L-Isoleucine	SLC16A10	hmdb:HMDBP05340; uniprot:Q8TF71
Pyruvate	SLC16A10	kegg:117247; ensembl:ENSG00000112394
Pyruvate	SLC16A10	hmdb:HMDBP05340; uniprot:Q8TF71
L-Histidine	SLC16A10	kegg:117247; ensembl:ENSG00000112394
L-Histidine	SLC16A10	hmdb:HMDBP05340; uniprot:Q8TF71
L-Glutamine	SLC16A10	kegg:117247; ensembl:ENSG00000112394
L-Glutamine	SLC16A10	hmdb:HMDBP05340; uniprot:Q8TF71
L-Phenylalanine	SLC16A10	kegg:117247; ensembl:ENSG00000112394
L-Phenylalanine	SLC16A10	hmdb:HMDBP05340; uniprot:Q8TF71
L-Alanine	SLC16A10	kegg:117247; ensembl:ENSG00000112394
L-Alanine	SLC16A10	hmdb:HMDBP05340; uniprot:Q8TF71
D-Mannose	LTF	hmdb:HMDBP02010; uniprot:P02788
D-Mannose	DNASE1	uniprot:P24855; hmdb:HMDBP00455
Ceramide	MCCC2	hmdb:HMDBP00508; uniprot:Q9HCC0
Ceramide	MCCC2	ensembl:ENSG00000131844; kegg:64087; uniprot:A0A140VK29
Creatine	CKM	kegg:1158; uniprot:B2R892; ensembl:ENSG00000104879
Creatine	CKM	uniprot:P06732; hmdb:HMDBP00722; entrez: entrez:1158
Citrate	RIMKLB	uniprot:Q9ULI2; hmdb:HMDBP08854
Citrate	RIMKLB	ensembl:ENSG00000166532; kegg:57494
Sphinganine	SPHK1	uniprot:Q96GK1; hmdb:HMDBP09386; hmdb:HMDBP01082; entrez: entrez:8877; uniprot:Q9NYA1
L-Proline	PRODH	kegg:5625; ensembl:ENSG00000100033
L-Proline	PRODH	uniprot:O43272; hmdb:HMDBP02042
L-Valine	COMT	uniprot:A0A140VJG8; kegg:1312; ensembl:ENSG00000093010
L-Valine	COMT	entrez: entrez:1312; uniprot:P21964; hmdb:HMDBP00272
Formicacid	CYP2C8	ensembl:ENSG00000138115; kegg:1558
Formicacid	CYP2C8	hmdb:HMDBP01562; uniprot:P10632; entrez: entrez:1558
L-Phenylalanine	GOT2	ensembl:ENSG00000125166; kegg:2806
L-Phenylalanine	GOT2	entrez: entrez:2806; hmdb:HMDBP00284; uniprot:P00505
L-Glutamine	GLS	hmdb:HMDBP00680; uniprot:O94925
L-Glutamine	GLS	ensembl:ENSG00000115419; kegg:2744
Pyruvate	DLD	kegg:1738; uniprot:A0A024R713; ensembl:ENSG00000091140
Pyruvate	DLD	hmdb:HMDBP00054; entrez: entrez:1738; uniprot:P09622
Glycocholicacid	BAAT	kegg:570; ensembl:ENSG00000136881
Glycocholicacid	BAAT	uniprot:Q14032; hmdb:HMDBP00549; entrez: entrez:570
Sphingomyelin	PLEKHA9	uniprot:O95397; hmdb:HMDBP11440
Ceramide	PLEKHA9	uniprot:O95397; hmdb:HMDBP11440
Sphinganine	PLEKHA9	uniprot:O95397; hmdb:HMDBP11440
Citrate	MDH2	uniprot:A0A024R4K3; kegg:4191; ensembl:ENSG00000146701; uniprot:B3KTM1
Citrate	MDH2	hmdb:HMDBP00858; entrez: entrez:4191; uniprot:P40926
Pyruvate	ADCY5	uniprot:B7Z2C7; ensembl:ENSG00000173175; kegg:111
Pyruvate	ADCY5	hmdb:HMDBP00707; uniprot:O95622; entrez: entrez:111
Phosphatidylcholine	SCARB1	uniprot:Q8WTV0; hmdb:HMDBP02237
Phosphatidylcholine	SCARB1	uniprot:A0A024RBS4; ensembl:ENSG00000073060; kegg:949
Phosphatidylcholine	SRB1	entrez: entrez:949
L-Histidine	SLC38A3	hmdb:HMDBP03036; uniprot:Q99624
L-Histidine	SLC38A3	kegg:10991; ensembl:ENSG00000188338
L-Alanine	SLC38A3	hmdb:HMDBP03036; uniprot:Q99624
L-Alanine	SLC38A3	kegg:10991; ensembl:ENSG00000188338
L-Glutamine	SLC38A3	hmdb:HMDBP03036; uniprot:Q99624;
L-Glutamine	SLC38A3	kegg:10991; ensembl:ENSG00000188338;
Creatine	GAMT	uniprot:Q14353; hmdb:HMDBP00426; entrez: entrez:2593
Creatine	GAMT	uniprot:V9HWB2; ensembl:ENSG00000130005; kegg:2593
Guanidoaceticacid	GAMT	uniprot:Q14353; hmdb:HMDBP00426; entrez: entrez:2593
Guanidoaceticacid	GAMT	uniprot:V9HWB2; ensembl:ENSG00000130005; kegg:2593
Sphinganine	FVT1	entrez: entrez:2531; entrez: entrez:2531
Sphinganine	KDSR	uniprot:Q06136; hmdb:HMDBP03056
Sphinganine	KDSR	kegg:2531; ensembl:ENSG00000119537; uniprot:A0A024R292
Dimethylamine	MAOA	ensembl:ENSG00000189221; uniprot:Q53YE7; kegg:4128; uniprot:Q49A63
Dimethylamine	MAOA	hmdb:HMDBP00169; uniprot:P21397; entrez: entrez:4128
Sphingomyelin	NPC2	hmdb:HMDBP02675; uniprot:P61916
Sphingomyelin	NPC2	kegg:10577; ensembl:ENSG00000119655; uniprot:A0A024R6C0
Ceramide	NPC2	hmdb:HMDBP02675; uniprot:P61916
Ceramide	NPC2	kegg:10577; ensembl:ENSG00000119655; uniprot:A0A024R6C0
Sphinganine	NPC2	hmdb:HMDBP02675; uniprot:P61916
Sphinganine	NPC2	kegg:10577; ensembl:ENSG00000119655; uniprot:A0A024R6C0
Ceramide	NSMAF	entrez: entrez:8439; hmdb:HMDBP10942; uniprot:Q92636
Ceramide	NSMAF	kegg:8439; ensembl:ENSG00000035681
Sphingomyelin	CD1C	uniprot:P29017; hmdb:HMDBP11445
Sphingomyelin	CD1C	kegg:911; ensembl:ENSG00000158481
Ceramide	CD1C	uniprot:P29017; hmdb:HMDBP11445
Ceramide	CD1C	kegg:911; ensembl:ENSG00000158481
Sphinganine	CD1C	uniprot:P29017; hmdb:HMDBP11445
Sphinganine	CD1C	kegg:911; ensembl:ENSG00000158481
Formicacid	CYP2C18	entrez: entrez:1562; hmdb:HMDBP01549; uniprot:P33260
Formicacid	CYP2C18	ensembl:ENSG00000108242; kegg:1562; uniprot:Q7Z348
D-Glucose	GPI	entrez: entrez:2821; uniprot:P06744; hmdb:HMDBP00806
D-Glucose	GPI	ensembl:ENSG00000105220; kegg:2821
Sphingomyelin	ENPP7	kegg:339221; ensembl:ENSG00000182156
Sphingomyelin	ENPP7	hmdb:HMDBP01089; uniprot:Q6UWV6
Ceramide	ENPP7	kegg:339221; ensembl:ENSG00000182156
Ceramide	ENPP7	hmdb:HMDBP01089; uniprot:Q6UWV6
D-Glucose	SLC2A1	uniprot:Q59GX2; kegg:6513; ensembl:ENSG00000117394
D-Glucose	GLUT1	entrez: entrez:6513
D-Glucose	SLC2A1	hmdb:HMDBP02114; uniprot:P11166
Formicacid	CYP1B1	entrez: entrez:1545; hmdb:HMDBP01547; uniprot:Q16678
Formicacid	CYP1B1	uniprot:Q53TK1; ensembl:ENSG00000138061; kegg:1545
Sphinganine	SPHK2	uniprot:Q9NRA0; entrez: entrez:56848; hmdb:HMDBP01083
Sphinganine	SPHK2	ensembl:ENSG00000063176; kegg:56848; uniprot:A0A024QZH5
Pyruvate	LDHAL6B	uniprot:Q9BYZ2; entrez: entrez:92483; hmdb:HMDBP03581
Pyruvate	LDHAL6B	kegg:92483; uniprot:A0A140VJM9; ensembl:ENSG00000171989
L-Lacticacid	LDHAL6B	uniprot:Q9BYZ2; entrez: entrez:92483; hmdb:HMDBP03581
L-Lacticacid	LDHAL6B	kegg:92483; uniprot:A0A140VJM9; ensembl:ENSG00000171989
L-Lysine	NSD3	kegg:54904; ensembl:ENSG00000147548
L-Lysine	WHSC1L1	uniprot:Q9BZ95; hmdb:HMDBP09023
Ceramide	AUH	ensembl:ENSG00000148090; kegg:549
Ceramide	AUH	uniprot:Q13825; hmdb:HMDBP00982
D-Mannose	IGF2R	kegg:3482; ensembl:ENSG00000197081
D-Mannose	IGF2R	hmdb:HMDBP01754; uniprot:P11717
L-Histidine	HAL	ensembl:ENSG00000084110; kegg:3034
L-Histidine	HAL	uniprot:P42357; hmdb:HMDBP00683
L-Lysine	MLL	entrez: entrez:4297; uniprot:Q03164; hmdb:HMDBP01970
L-Lysine	KMT2A	ensembl:ENSG00000118058; kegg:4297
L-Glutamine	F13A1	hmdb:HMDBP00672; uniprot:P00488;
L-Glutamine	F13A1	ensembl:ENSG00000124491; kegg:2162;
Sphingomyelin	PIGC	kegg:5279; ensembl:ENSG00000135845
Sphingomyelin	PIGC	hmdb:HMDBP00944; uniprot:Q92535
Ceramide	PIGC	kegg:5279; ensembl:ENSG00000135845
Ceramide	PIGC	hmdb:HMDBP00944; uniprot:Q92535
Sphinganine	PIGC	kegg:5279; ensembl:ENSG00000135845
Sphinganine	PIGC	hmdb:HMDBP00944; uniprot:Q92535
Ceramide	ACER1	ensembl:ENSG00000167769; kegg:125981
Ceramide	ACER1	hmdb:HMDBP10638; uniprot:Q8TDN7
Sphinganine	ACER1	ensembl:ENSG00000167769; kegg:125981
Sphinganine	ACER1	hmdb:HMDBP10638; uniprot:Q8TDN7
Ceramide	MCCC1	kegg:56922; uniprot:A0A0S2Z693; ensembl:ENSG00000078070
Ceramide	MCCC1	hmdb:HMDBP00510; uniprot:Q96RQ3
D-Mannose	CTSD	uniprot:P07339; hmdb:HMDBP02285; entrez: entrez:1509
D-Mannose	CTSD	uniprot:V9HWI3; kegg:1509; ensembl:ENSG00000117984
L-Proline	P4HA2	ensembl:ENSG00000072682; uniprot:Q05DA4; kegg:8974
L-Proline	P4HA2	hmdb:HMDBP00302; uniprot:O15460
Carnitine	SLC22A16	uniprot:Q86VW1; hmdb:HMDBP02811
Phosphatidylcholine	DGKD	ensembl:ENSG00000077044; kegg:8527
Phosphatidylcholine	DGKD	hmdb:HMDBP00234; uniprot:Q16760
L-Alanine	AARS2	uniprot:Q5JTZ9; hmdb:HMDBP10671
L-Alanine	AARS2	kegg:57505; ensembl:ENSG00000124608
Sphingomyelin	PLEKHA8	hmdb:HMDBP11442; uniprot:B5MDU3
Ceramide	PLEKHA8	hmdb:HMDBP11442; uniprot:B5MDU3; hmdb:HMDBP07339; uniprot:Q96JA3
Sphinganine	PLEKHA8	hmdb:HMDBP11442; uniprot:B5MDU3; hmdb:HMDBP07339; uniprot:Q96JA3
Formicacid	ADI1	hmdb:HMDBP10676; uniprot:Q9BV57
Formicacid	ADI1	kegg:55256; ensembl:ENSG00000182551
L-Glutamine	PET112	hmdb:HMDBP01952; uniprot:O75879
L-Glutamine	GATB	ensembl:ENSG00000059691; kegg:5188
D-Glucose	G6PC3	ensembl:ENSG00000141349; kegg:92579
D-Glucose	G6PC3	uniprot:Q9BUM1; hmdb:HMDBP05099
Carnitine	CPT1C	uniprot:B3KU49; ensembl:ENSG00000169169; kegg:126129; uniprot:A0A024QZE3
Carnitine	CPT1C	uniprot:Q8TCG5; hmdb:HMDBP00312
Carnitine	CPT1C(brain)	entrez: entrez:126129
Choline	BCHE	hmdb:HMDBP00525; uniprot:P06276
D-Mannose	BCHE	hmdb:HMDBP00525; uniprot:P06276
L-Phenylalanine	FARSLA	uniprot:Q6IBR2; hmdb:HMDBP09254
L-Glutamine	SLC1A5	uniprot:Q59ES3; kegg:6510; ensembl:ENSG00000105281
L-Glutamine	SLC1A5	uniprot:Q15758; hmdb:HMDBP01955
Sphingomyelin	LBP	hmdb:HMDBP11446; uniprot:P18428; entrez: entrez:3929
Sphingomyelin	LBP	ensembl:ENSG00000129988; kegg:3929; uniprot:Q8TCF0
Ceramide	LBP	hmdb:HMDBP11446; uniprot:P18428; entrez: entrez:3929
Ceramide	LBP	ensembl:ENSG00000129988; kegg:3929; uniprot:Q8TCF0
Sphinganine	LBP	hmdb:HMDBP11446; uniprot:P18428; entrez: entrez:3929
Sphinganine	LBP	ensembl:ENSG00000129988; kegg:3929; uniprot:Q8TCF0
Sphingomyelin	PIGL	hmdb:HMDBP00557; uniprot:Q9Y2B2
Sphingomyelin	PIGL	ensembl:ENSG00000108474; kegg:9487
Ceramide	PIGL	hmdb:HMDBP00557; uniprot:Q9Y2B2
Ceramide	PIGL	ensembl:ENSG00000108474; kegg:9487
Sphinganine	PIGL	hmdb:HMDBP00557; uniprot:Q9Y2B2
Sphinganine	PIGL	ensembl:ENSG00000108474; kegg:9487
D-Mannose	GYPB	kegg:2994; ensembl:ENSG00000250361
D-Mannose	GYPB	uniprot:P06028; hmdb:HMDBP01980
Choline	SLC22A1	ensembl:ENSG00000175003; kegg:6580
Choline	SLC22A1	uniprot:O15245; hmdb:HMDBP02574
Sphinganine	CerS3	entrez: entrez:204219
Sphinganine	CERS3	kegg:204219; ensembl:ENSG00000154227
Sphinganine	CERS3	uniprot:Q8IU89; hmdb:HMDBP11631
Sphingomyelin	CD1E	hmdb:HMDBP02412; uniprot:P15812
Sphingomyelin	CD1E	uniprot:A2RRL5; ensembl:ENSG00000158488; kegg:913
Ceramide	CD1E	hmdb:HMDBP02412; uniprot:P15812
Ceramide	CD1E	uniprot:A2RRL5; ensembl:ENSG00000158488; kegg:913
Sphinganine	CD1E	hmdb:HMDBP02412; uniprot:P15812
Sphinganine	CD1E	uniprot:A2RRL5; ensembl:ENSG00000158488; kegg:913
Sphingomyelin	GLTPD2	uniprot:A6NH11; hmdb:HMDBP11441
Ceramide	GLTPD2	uniprot:A6NH11; hmdb:HMDBP11441
Sphinganine	GLTPD2	uniprot:A6NH11; hmdb:HMDBP11441
L-Glutamine	GATC	ensembl:ENSG00000257218; kegg:283459
L-Glutamine	GATC	hmdb:HMDBP11741; uniprot:O43716
L-Alanine	KYNU	ensembl:ENSG00000115919; kegg:8942
L-Alanine	KYNU	hmdb:HMDBP00325; entrez: entrez:8942; uniprot:Q16719
L-Proline	PYCR1	uniprot:P32322; hmdb:HMDBP00303; entrez: entrez:5831
L-Proline	PYCR1	ensembl:ENSG00000183010; uniprot:A0A024R8U9; kegg:5831
Pyruvate	ME2	ensembl:ENSG00000082212; kegg:4200
Pyruvate	ME2	uniprot:P23368; hmdb:HMDBP00862
L-Lysine	DOT1L	kegg:84444; ensembl:ENSG00000104885
L-Lysine	DOT1L	hmdb:HMDBP00402; uniprot:Q8TEK3
Pyruvate	PKM	uniprot:V9HWB8; kegg:5315; ensembl:ENSG00000067225
Pyruvate	PKM2	entrez: entrez:5315; entrez: entrez:5315
Pyruvate	PKM	hmdb:HMDBP00763; uniprot:P14618
Pyruvate	CTH	uniprot:P32929; hmdb:HMDBP00538
Pyruvate	CTH	ensembl:ENSG00000116761; kegg:1491
L-Lysine	EHMT2	entrez: entrez:10919; uniprot:Q96KQ7; hmdb:HMDBP00419
L-Lysine	EHMT2	ensembl:ENSG00000204371; kegg:10919; uniprot:A0A024RCN9
D-Mannose	GLA	uniprot:P06280; hmdb:HMDBP00723
D-Mannose	GLA	ensembl:ENSG00000102393; kegg:2717
D-Mannose	alpha-galactosidaseA	entrez: entrez:2717; entrez: entrez:2717
D-Glucose	GLA	uniprot:P06280; hmdb:HMDBP00723
D-Glucose	GLA	ensembl:ENSG00000102393; kegg:2717
D-Glucose	alpha-galactosidaseA	entrez: entrez:2717
L-Glutamine	TGM6	hmdb:HMDBP00691; uniprot:O95932
Pyruvate	ADCY9	ensembl:ENSG00000162104; kegg:115
Pyruvate	ADCY9	entrez: entrez:115; uniprot:O60503; hmdb:HMDBP00709
D-Glucose	GANAB	uniprot:Q14697; hmdb:HMDBP00366
D-Glucose	GANAB	kegg:23193; ensembl:ENSG00000089597; uniprot:V9HWJ0
Pyruvate	PC	uniprot:P11498; hmdb:HMDBP00019; entrez: entrez:5091
Pyruvate	PC	uniprot:A0A024R5C5; kegg:5091; ensembl:ENSG00000173599
Citrate	CPB1	kegg:1360; ensembl:ENSG00000153002
Citrate	CPB1	uniprot:P15086; hmdb:HMDBP10015
Sphingomyelin	PIGZ	uniprot:Q86VD9; hmdb:HMDBP03088
Sphingomyelin	PIGZ	kegg:80235; uniprot:B4DL68; ensembl:ENSG00000119227
Ceramide	PIGZ	uniprot:Q86VD9; hmdb:HMDBP03088
Ceramide	PIGZ	kegg:80235; uniprot:B4DL68; ensembl:ENSG00000119227
Sphinganine	PIGZ	uniprot:Q86VD9; hmdb:HMDBP03088
Sphinganine	PIGZ	kegg:80235; uniprot:B4DL68; ensembl:ENSG00000119227
Creatine	CKMT1B	kegg:1159; ensembl:ENSG00000237289
Creatine	CKMT1A	ensembl:ENSG00000223572; kegg:548596
Creatine	CKMT1A	uniprot:P12532; hmdb:HMDBP00721
Choline	ADH1C	uniprot:P00326; hmdb:HMDBP00786; entrez: entrez:126
Choline	ADH1C	kegg:126; ensembl:ENSG00000248144
Pyruvate	SLC16A1	hmdb:HMDBP01111; uniprot:P53985
L-Lacticacid	SLC16A1	hmdb:HMDBP01111; uniprot:P53985
L-Glutamine	TGM5	uniprot:O43548; hmdb:HMDBP00679
D-Mannose	DPP4	hmdb:HMDBP01651; uniprot:P27487
D-Mannose	DPP4	ensembl:ENSG00000197635; kegg:1803
L-Lysine	EZH2	ensembl:ENSG00000106462; kegg:2146
L-Lysine	EZH2	uniprot:Q15910; hmdb:HMDBP09013
Formicacid	CYP2A13	hmdb:HMDBP01556; entrez: entrez:1553; uniprot:Q16696
Formicacid	CYP2A13	ensembl:ENSG00000197838; kegg:1553
Pyruvate	ADCY2	kegg:108; ensembl:ENSG00000078295; uniprot:Q71UM8
Pyruvate	ADCY2	hmdb:HMDBP00921; uniprot:Q08462; entrez: entrez:108
L-Glutamine	GMPS	uniprot:P49915; hmdb:HMDBP00592
L-Glutamine	GMPS	ensembl:ENSG00000163655; kegg:8833; uniprot:A0A140VJK6
L-Isoleucine	IARS2	uniprot:Q9NSE4; hmdb:HMDBP10675
L-Isoleucine	IARS2	kegg:55699; ensembl:ENSG00000067704
Pyruvate	ADCY4	entrez: entrez:196883; hmdb:HMDBP00705; uniprot:Q8NFM4
Pyruvate	ADCY4	kegg:196883; ensembl:ENSG00000129467
L-Glutamine	SLC7A8	ensembl:ENSG00000092068; kegg:23428; uniprot:Q53EM9
L-Glutamine	SLC7A8	uniprot:Q9UHI5; hmdb:HMDBP02392
L-Phenylalanine	SLC7A8	ensembl:ENSG00000092068; kegg:23428; uniprot:Q53EM9
L-Phenylalanine	SLC7A8	uniprot:Q9UHI5; hmdb:HMDBP02392
L-Alanine	SLC7A8	ensembl:ENSG00000092068; kegg:23428; uniprot:Q53EM9
L-Alanine	SLC7A8	uniprot:Q9UHI5; hmdb:HMDBP02392
Choline	ADH1A	uniprot:P07327; entrez: entrez:124; hmdb:HMDBP00784
Choline	ADH1A	ensembl:ENSG00000187758; kegg:124
L-Glutamine	CTPS2	ensembl:ENSG00000047230; uniprot:A0A024RC00; kegg:56474
L-Glutamine	CTPS2	uniprot:Q9NRF8; hmdb:HMDBP04074; entrez: entrez:56474
D-Glucose	GANC	kegg:2595; ensembl:ENSG00000214013
D-Glucose	GANC	hmdb:HMDBP05979; uniprot:Q8TET4
Pyruvate	SRR	uniprot:Q3ZK31; ensembl:ENSG00000167720; kegg:63826; uniprot:Q8N3F4
Pyruvate	SRR	hmdb:HMDBP08975; uniprot:Q9GZT4
L-Lysine	KARS	kegg:3735; ensembl:ENSG00000065427
L-Lysine	KARS	uniprot:Q15046; hmdb:HMDBP00613
Sphingomyelin	PIGK	uniprot:Q92643; hmdb:HMDBP11012
Sphingomyelin	PIGK	ensembl:ENSG00000142892; kegg:10026
Ceramide	PIGK	uniprot:Q92643; hmdb:HMDBP11012
Ceramide	PIGK	ensembl:ENSG00000142892; kegg:10026
Sphinganine	PIGK	uniprot:Q92643; hmdb:HMDBP11012
Sphinganine	PIGK	ensembl:ENSG00000142892; kegg:10026
D-Mannose	GNPTAB	uniprot:Q3T906; hmdb:HMDBP09389
D-Mannose	GNPTAB	kegg:79158; ensembl:ENSG00000111670
Formicacid	CYP2A7	hmdb:HMDBP01566; uniprot:P20853
L-Lysine	BTD	uniprot:P43251; hmdb:HMDBP00546
L-Lysine	BTD	ensembl:ENSG00000169814; kegg:686
D-Mannose	ALG3	uniprot:Q92685; hmdb:HMDBP01604
D-Mannose	ALG3	ensembl:ENSG00000214160; kegg:10195
Carnitine	CPT1B	ensembl:ENSG00000205560; uniprot:A0A024R4W7; kegg:1375
Carnitine	CPT1B(muscle)	entrez: entrez:1375
Carnitine	CPT1B	uniprot:Q92523; hmdb:HMDBP00308
Formicacid	CYP3A5	ensembl:ENSG00000106258; kegg:1577
Formicacid	CYP3A5	entrez: entrez:1577; hmdb:HMDBP01554; uniprot:P20815
D-Glucose	GCKR	hmdb:HMDBP02909; uniprot:Q14397
D-Glucose	B4GALT2	hmdb:HMDBP00371; uniprot:O60909
D-Glucose	B4GALT2	kegg:8704; ensembl:ENSG00000117411
L-Lacticacid	SLC16A7	uniprot:O60669; hmdb:HMDBP01115
Pyruvate	SLC16A7	uniprot:O60669; hmdb:HMDBP01115;
Pyruvate	ADCY8	entrez: entrez:114; hmdb:HMDBP00708; uniprot:P40145
Pyruvate	ADCY8	uniprot:A0A0K0K1K3; uniprot:Q4F7X0; kegg:114; ensembl:ENSG00000155897
L-Phenylalanine	FARSA	uniprot:Q9Y285; hmdb:HMDBP00274
L-Phenylalanine	FARSA	ensembl:ENSG00000179115; kegg:2193
Pyruvate	SLC16A3	hmdb:HMDBP01109; uniprot:O15427
Pyruvate	SLC16A3	uniprot:A0A024R8U1; kegg:9123; ensembl:ENSG00000141526
L-Lacticacid	SLC16A3	hmdb:HMDBP01109; uniprot:O15427
L-Lacticacid	SLC16A3	uniprot:A0A024R8U1; kegg:9123; ensembl:ENSG00000141526
Ceramide	SPHK1	uniprot:Q53ZR5; kegg:8877; ensembl:ENSG00000176170
Ceramide	SPHK1	hmdb:HMDBP01082; entrez: entrez:8877; uniprot:Q9NYA1
Sphinganine	SPHK1	uniprot:Q53ZR5; kegg:8877; ensembl:ENSG00000176170
Sphingomyelin	PIGH	kegg:5283; ensembl:ENSG00000100564
Sphingomyelin	PIGH	uniprot:Q14442; hmdb:HMDBP00942
Ceramide	PIGH	kegg:5283; ensembl:ENSG00000100564
Ceramide	PIGH	uniprot:Q14442; hmdb:HMDBP00942
Sphinganine	PIGH	kegg:5283; ensembl:ENSG00000100564
Sphinganine	PIGH	uniprot:Q14442; hmdb:HMDBP00942
Formicacid	CYP4B1	uniprot:P13584; hmdb:HMDBP01558
Ceramide	CERK	ensembl:ENSG00000100422; uniprot:A0A024R4U8; kegg:64781
Ceramide	CERK	uniprot:Q8TCT0; hmdb:HMDBP01405
Ceramide	ERK	entrez: entrez:64781
L-Histidine	CARNS1	kegg:57571; ensembl:ENSG00000172508
L-Histidine	CARNS1	uniprot:A5YM72; hmdb:HMDBP08844
L-Lysine	CARNS1	kegg:57571; ensembl:ENSG00000172508
L-Lysine	CARNS1	uniprot:A5YM72; hmdb:HMDBP08844
D-Mannose	C1R	ensembl:ENSG00000159403; kegg:715
D-Mannose	C1R	hmdb:HMDBP07480; uniprot:P00736; entrez: entrez:715
L-Glutamine	QARS	uniprot:B7Z840; kegg:5859; ensembl:ENSG00000172053
L-Glutamine	QARS	uniprot:P47897; hmdb:HMDBP00580
Ceramide	UGT8	ensembl:ENSG00000174607; kegg:7368
Ceramide	UGT8	hmdb:HMDBP01101; uniprot:Q16880
D-Mannose	NPR3	hmdb:HMDBP08178; uniprot:P17342
L-Alanine	MOCOS	ensembl:ENSG00000075643; kegg:55034
L-Alanine	MOCOS	hmdb:HMDBP08969; uniprot:Q96EN8
L-Proline	LEPRE1	uniprot:Q32P28; hmdb:HMDBP08681
Sphingomyelin	B3GAT1	ensembl:ENSG00000109956; kegg:27087
Sphingomyelin	B3GAT1	hmdb:HMDBP00935; uniprot:Q9P2W7
L-Proline	PARS2	ensembl:ENSG00000162396; kegg:25973
L-Proline	PARS2	hmdb:HMDBP10694; uniprot:Q7L3T8
L-Lysine	NSD1	uniprot:Q96L73; hmdb:HMDBP00410
L-Lysine	NSD1	kegg:64324; ensembl:ENSG00000165671
Ceramide	ASAH2	uniprot:Q9NR71; hmdb:HMDBP09165; entrez: entrez:56624
Ceramide	ASAH2	kegg:56624; ensembl:ENSG00000188611
Creatine	ID3	entrez: entrez:3399; hmdb:HMDBP10740; uniprot:Q02535
Creatine	ID3	ensembl:ENSG00000117318; kegg:3399
L-Lacticacid	HAGH	uniprot:Q16775; hmdb:HMDBP00812
L-Lacticacid	HAGH	kegg:3029; ensembl:ENSG00000063854
D-Glucose	AGL	uniprot:A0A0S2A4E4; kegg:178; ensembl:ENSG00000162688
D-Glucose	AGL	uniprot:P35573; hmdb:HMDBP00367; entrez: entrez:178
D-Mannose	LGALS1	hmdb:HMDBP02427; uniprot:P09382
Glycocholicacid	GLYATL3	uniprot:Q5SZD4; hmdb:HMDBP07352
Choline	PLD3	hmdb:HMDBP07291; uniprot:Q8IV08
Choline	PLD3	kegg:23646; uniprot:A0A024R0Q4; ensembl:ENSG00000105223
L-Alanine	PGLYRP4	uniprot:Q96LB8; hmdb:HMDBP09367
L-Lysine	PLOD3	ensembl:ENSG00000106397; kegg:8985; uniprot:Q9UG85
L-Lysine	PLOD3	uniprot:O60568; hmdb:HMDBP00462
L-Proline	EGLN1	hmdb:HMDBP09210; uniprot:Q9GZT9; entrez: entrez:54583
L-Proline	EGLN1	kegg:54583; uniprot:R4SCQ0; ensembl:ENSG00000135766
L-Histidine	METTL6	uniprot:Q8TCB7; hmdb:HMDBP11825
L-Lysine	WHSC1	uniprot:O96028; hmdb:HMDBP09022
L-Lysine	NSD2	kegg:7468; ensembl:ENSG00000109685
Formicacid	MTHFD2	uniprot:Q7Z650; hmdb:HMDBP07379
Sphinganine	CERS4	uniprot:Q53HF9; kegg:79603; ensembl:ENSG00000090661
Sphinganine	CerS4	entrez: entrez:79603; entrez: entrez:79603
Sphinganine	CERS4	uniprot:Q9HA82; hmdb:HMDBP11632
D-Mannose	AZGP1	hmdb:HMDBP02009; uniprot:P25311
Formicacid	CYP2C19	entrez: entrez:1557; hmdb:HMDBP01038; uniprot:P33261
Formicacid	CYP2C19	ensembl:ENSG00000165841; kegg:1557
Formicacid	CYP3A4	ensembl:ENSG00000160868; uniprot:Q6GRK0; kegg:1576
Formicacid	CYP3A4	entrez: entrez:1576; hmdb:HMDBP01018; uniprot:P08684
L-Glutamine	NADSYN1	uniprot:Q6IA69; hmdb:HMDBP03241
L-Glutamine	NADSYN1	kegg:55191; ensembl:ENSG00000172890
L-Proline	P4HTM	hmdb:HMDBP09213; uniprot:Q9NXG6
Pyruvate	LDHA	entrez: entrez:3939; uniprot:P00338; hmdb:HMDBP03579
Pyruvate	LDHA	ensembl:ENSG00000134333; kegg:3939; uniprot:V9HWB9
L-Lacticacid	LDHA	entrez: entrez:3939; uniprot:P00338; hmdb:HMDBP03579
L-Lacticacid	LDHA	ensembl:ENSG00000134333; kegg:3939; uniprot:V9HWB9
D-Mannose	GALNT1	kegg:2589; uniprot:A0A024RC48; ensembl:ENSG00000141429; uniprot:Q05BM8
D-Mannose	GALNT1	hmdb:HMDBP01008; uniprot:Q10472
Pyruvate	ADCY6	ensembl:ENSG00000174233; kegg:112
Pyruvate	ADCY6	entrez: entrez:112; uniprot:O43306; hmdb:HMDBP00706; entrez: entrez:112; uniprot:O43306; hmdb:HMDBP00706
Pyruvate	SDS	uniprot:P20132; hmdb:HMDBP00671
Pyruvate	SDS	ensembl:ENSG00000135094; uniprot:Q8WW81; kegg:10993;
L-Glutamine	TGM2	kegg:7052; uniprot:V9HWG3; ensembl:ENSG00000198959
L-Glutamine	TGM2	hmdb:HMDBP00667; uniprot:P21980
L-Glutamine	TGM1	uniprot:P22735; hmdb:HMDBP00682
D-Glucose	GCK	hmdb:HMDBP00210; uniprot:P35557; entrez: entrez:2645
D-Glucose	GCK	kegg:2645; ensembl:ENSG00000106633; uniprot:Q53Y25
D-Mannose	GCK	hmdb:HMDBP00210; uniprot:P35557; entrez: entrez:2645
D-Mannose	GCK	kegg:2645; ensembl:ENSG00000106633; uniprot:Q53Y25
Sphingomyelin	GPAA1	hmdb:HMDBP11439; uniprot:O43292
Sphingomyelin	GPAA1	ensembl:ENSG00000197858; kegg:8733
Ceramide	GPAA1	hmdb:HMDBP11439; uniprot:O43292
Ceramide	GPAA1	ensembl:ENSG00000197858; kegg:8733
Sphinganine	GPAA1	hmdb:HMDBP11439; uniprot:O43292
Sphinganine	GPAA1	ensembl:ENSG00000197858; kegg:8733
D-Glucose	PGM1	hmdb:HMDBP01107; uniprot:P36871; entrez: entrez:5236
D-Glucose	PGM1	kegg:5236; ensembl:ENSG00000079739
Pyruvate	SLC16A6	hmdb:HMDBP01110; uniprot:O15403
L-Glutamine	QRSL1	ensembl:ENSG00000130348; kegg:55278
L-Glutamine	QRSL1	hmdb:HMDBP10657; uniprot:Q9H0R6
D-Glucose	TREH	ensembl:ENSG00000118094; kegg:11181
D-Glucose	TREH	hmdb:HMDBP00374; uniprot:O43280
Citrate	IL4I1	hmdb:HMDBP08281; uniprot:Q96RQ9
Citrate	IL4I1	ensembl:ENSG00000104951; kegg:259307
L-Isoleucine	IL4I1	hmdb:HMDBP08281; uniprot:Q96RQ9
L-Isoleucine	IL4I1	ensembl:ENSG00000104951; kegg:259307
L-Phenylalanine	IL4I1	hmdb:HMDBP08281; uniprot:Q96RQ9
L-Phenylalanine	IL4I1	ensembl:ENSG00000104951; kegg:259307
Ceramide	B3GNT5	kegg:84002; ensembl:ENSG00000176597
Ceramide	B3GNT5	hmdb:HMDBP06380; uniprot:Q9BYG0
Sphingomyelin	B3GNT5	kegg:84002; ensembl:ENSG00000176597
Sphingomyelin	B3GNT5	hmdb:HMDBP06380; uniprot:Q9BYG0
Sphinganine	B3GNT5	kegg:84002; ensembl:ENSG00000176597
Sphinganine	B3GNT5	hmdb:HMDBP06380; uniprot:Q9BYG0
Choline	SLC44A2	uniprot:Q8IWA5; hmdb:HMDBP10795
Choline	SLC44A2	kegg:57153; ensembl:ENSG00000129353
Ceramide	GLTP	hmdb:HMDBP11449; uniprot:Q9NZD2
Sphingomyelin	GLTP	hmdb:HMDBP11449; uniprot:Q9NZD2
Sphinganine	GLTP	hmdb:HMDBP11449; uniprot:Q9NZD2
Choline	PLD1	ensembl:ENSG00000075651; kegg:5337
Choline	PLD1	hmdb:HMDBP00082; uniprot:Q13393; entrez: entrez:5337
Pyruvate	NPL	ensembl:ENSG00000135838; kegg:80896
Pyruvate	NPL	hmdb:HMDBP07357; uniprot:Q9BXD5
L-Histidine	METTL2B	hmdb:HMDBP11824; uniprot:Q6P1Q9
Citrate	CS	entrez: entrez:1431; hmdb:HMDBP00043; uniprot:O75390
Citrate	CS	ensembl:ENSG00000062485; uniprot:A0A024RB75; kegg:1431
Betaine	BHMT2	kegg:23743; uniprot:A0A024RAQ0; ensembl:ENSG00000132840
Betaine	BHMT2	uniprot:Q9H2M3; hmdb:HMDBP04296
Sphingomyelin	PIGS	uniprot:Q96IR5; ensembl:ENSG00000087111; uniprot:Q8NBL9; kegg:94005
Sphingomyelin	PIGS	hmdb:HMDBP07330; uniprot:Q96S52
Ceramide	PIGS	uniprot:Q96IR5; ensembl:ENSG00000087111; uniprot:Q8NBL9
Ceramide	PIGS	hmdb:HMDBP07330; uniprot:Q96S52
Sphinganine	PIGS	uniprot:Q96IR5; ensembl:ENSG00000087111; uniprot:Q8NBL9; kegg:94005
Sphinganine	PIGS	hmdb:HMDBP07330; uniprot:Q96S52
Phosphatidylcholine	PTDSS2	uniprot:A0A024RC97; ensembl:ENSG00000174915; kegg:81490
Phosphatidylcholine	PTDSS2	hmdb:HMDBP02960; uniprot:Q9BVG9
L-Glutamine	ASNS	ensembl:ENSG00000070669; kegg:440
L-Glutamine	ASNS	entrez: entrez:440; uniprot:P08243; hmdb:HMDBP00583
Citrate	HS3ST3A1	hmdb:HMDBP00340; uniprot:Q9Y663; hmdb:HMDBP00340; uniprot:Q9Y663
Citrate	HS3ST3A1	ensembl:ENSG00000153976; kegg:9955
L-Alanine	PGLYRP2	hmdb:HMDBP11877; uniprot:Q96PD5
Ceramide	CERS1	kegg:10715; ensembl:ENSG00000223802
Ceramide	CERS1	hmdb:HMDBP02779; uniprot:P27544
Sphinganine	CERS1	kegg:10715; ensembl:ENSG00000223802
Sphinganine	CERS1	hmdb:HMDBP02779; uniprot:P27544
Ceramide	IVD	kegg:3712; uniprot:A0A0A0MT83; ensembl:ENSG00000128928
Ceramide	IVD	hmdb:HMDBP00166; uniprot:P26440
L-Proline	P4HA3	ensembl:ENSG00000149380; kegg:283208
L-Proline	P4HA3	hmdb:HMDBP09111; uniprot:Q7Z4N8
Sphingomyelin	GLTPD1	uniprot:Q5TA50; hmdb:HMDBP11444
Ceramide	GLTPD1	uniprot:Q5TA50; hmdb:HMDBP11444
Sphinganine	GLTPD1	uniprot:Q5TA50; hmdb:HMDBP11444
L-Phenylalanine	GOT1	uniprot:A0A140VK69; kegg:2805; ensembl:ENSG00000120053
L-Phenylalanine	GOT1	entrez: entrez:2805; uniprot:P17174; hmdb:HMDBP00283
Ceramide	ABCA7	uniprot:Q8IZY2; hmdb:HMDBP10979
Ceramide	ABCA7	uniprot:B3KUJ3; kegg:10347; ensembl:ENSG00000064687
L-Proline	PPIB	hmdb:HMDBP10692; uniprot:P23284
L-Proline	P5CR2	uniprot:Q4W8W1; hmdb:HMDBP03153
Pyruvate	AMD1	uniprot:A0A088AWN0; kegg:262; uniprot:B4DZ60; ensembl:ENSG00000123505; uniprot:Q6N0B2
Pyruvate	AMD1	uniprot:P17707; hmdb:HMDBP00420
Ceramide	LARS	ensembl:ENSG00000133706; kegg:51520
Ceramide	LARS	uniprot:Q9P2J5; hmdb:HMDBP00648
Formicacid	GCH1	uniprot:A0A024R642; kegg:2643; ensembl:ENSG00000131979
Formicacid	GCH1	hmdb:HMDBP00938; uniprot:P30793
Carnitine	CPT1A	uniprot:Q8WZ48; kegg:1374; ensembl:ENSG00000110090; uniprot:B2RAQ8; uniprot:A0A024R5F4
Carnitine	CPT1A	uniprot:P50416; hmdb:HMDBP00309
Carnitine	CPT1A(liver)	entrez: entrez:1374
Formicacid	CYP2J2	ensembl:ENSG00000134716; kegg:1573
Formicacid	CYP2J2	entrez: entrez:1573; uniprot:P51589; hmdb:HMDBP01565
L-Valine	VARS	uniprot:A0A024RCN6; ensembl:ENSG00000204394; kegg:7407
L-Valine	VARS	uniprot:P26640; hmdb:HMDBP00651
Sphingomyelin	PIGV	kegg:55650; ensembl:ENSG00000060642
Sphingomyelin	PIGV	hmdb:HMDBP07333; uniprot:Q9NUD9
Ceramide	PIGV	kegg:55650; ensembl:ENSG00000060642
Ceramide	PIGV	hmdb:HMDBP07333; uniprot:Q9NUD9
Sphinganine	PIGV	kegg:55650; ensembl:ENSG00000060642
Sphinganine	PIGV	hmdb:HMDBP07333; uniprot:Q9NUD9
D-Mannose	PTGS1	hmdb:HMDBP00976; entrez: entrez:5742; uniprot:P23219
D-Mannose	PTGS1	kegg:5742; ensembl:ENSG00000095303
Formicacid	CYP2S1	ensembl:ENSG00000167600; kegg:29785
Formicacid	CYP2S1	hmdb:HMDBP01563; uniprot:Q96SQ9; entrez: entrez:29785
Creatine	CKMT2	hmdb:HMDBP00719; uniprot:P17540
Creatine	CKMT2	kegg:1160; uniprot:A0A024RAK5; ensembl:ENSG00000131730
D-Mannose	MAN2B1	ensembl:ENSG00000104774; kegg:4125
D-Mannose	MAN2B1	uniprot:O00754; hmdb:HMDBP11810
L-Phenylalanine	FARS2	kegg:10667; ensembl:ENSG00000145982
L-Phenylalanine	FARS2	uniprot:O95363; hmdb:HMDBP00275
Pyruvate	PKLR	kegg:5313; ensembl:ENSG00000143627
Pyruvate	PKLR	uniprot:P30613; entrez: entrez:5313; hmdb:HMDBP00765
Choline	CEPT1	kegg:10390; ensembl:ENSG00000134255; uniprot:A0A024R0C0
Choline	CEPT1	uniprot:Q9Y6K0; hmdb:HMDBP03349
Creatine	SLC6A8	hmdb:HMDBP02873; uniprot:P48029
Sphingomyelin	PSAP	ensembl:ENSG00000197746; kegg:5660; uniprot:A0A024QZQ2
Sphingomyelin	PSAP	hmdb:HMDBP01673; uniprot:P07602
L-Phenylalanine	ACE2	ensembl:ENSG00000130234; kegg:59272
L-Phenylalanine	ACE2	uniprot:Q9BYF1; entrez: entrez:59272; hmdb:HMDBP08177
Formicacid	CYP2E1	ensembl:ENSG00000130649; kegg:1571
Formicacid	CYP2E1	entrez: entrez:1571; hmdb:HMDBP01544; uniprot:P05181
Ceramide	PLPP2	kegg:8612; ensembl:ENSG00000141934
Ceramide	PPAP2C	hmdb:HMDBP00231; entrez: entrez:8612; uniprot:O43688
Sphinganine	PLPP2	kegg:8612; ensembl:ENSG00000141934
Sphinganine	PPAP2C	hmdb:HMDBP00231; entrez: entrez:8612; uniprot:O43688
L-Proline	LEPREL1	hmdb:HMDBP08682; uniprot:Q8IVL5
Phosphatidylcholine	DGKG	kegg:1608; ensembl:ENSG00000058866
Phosphatidylcholine	DGKG	hmdb:HMDBP00225; uniprot:P49619
Citrate	ANG	uniprot:P03950; hmdb:HMDBP01814
D-Mannose	HKDC1	hmdb:HMDBP11783; uniprot:Q2TB90
D-Mannose	HKDC1	ensembl:ENSG00000156510; uniprot:B3KT70; kegg:80201
D-Glucose	HKDC1	hmdb:HMDBP11783; uniprot:Q2TB90
D-Glucose	HKDC1	ensembl:ENSG00000156510; uniprot:B3KT70; kegg:80201
Sphingomyelin	PIGX	kegg:54965; ensembl:ENSG00000163964
Sphingomyelin	PIGX	uniprot:Q8TBF5; hmdb:HMDBP03084
Ceramide	PIGX	kegg:54965; ensembl:ENSG00000163964
Ceramide	PIGX	uniprot:Q8TBF5; hmdb:HMDBP03084
Sphinganine	PIGX	kegg:54965; ensembl:ENSG00000163964
Sphinganine	PIGX	uniprot:Q8TBF5; hmdb:HMDBP03084
D-Mannose	IFNB1	kegg:3456; ensembl:ENSG00000171855
D-Mannose	IFNB1	uniprot:P01574; hmdb:HMDBP02832; entrez: entrez:3456
Choline	ADH6	uniprot:Q8IUN7; kegg:130; ensembl:ENSG00000172955
Choline	ADH6	hmdb:HMDBP00785; entrez: entrez:130; uniprot:P28332
Ceramide	PPAP2B	hmdb:HMDBP00242; entrez: entrez:8613; uniprot:O14495
Ceramide	PLPP3	ensembl:ENSG00000162407; kegg:8613
Sphinganine	PPAP2B	hmdb:HMDBP00242; entrez: entrez:8613; uniprot:O14495
Sphinganine	PLPP3	ensembl:ENSG00000162407; kegg:8613
Pyruvate	MPST	kegg:4357; uniprot:A0A140VJX3; ensembl:ENSG00000128309
Pyruvate	MPST	uniprot:P25325; hmdb:HMDBP00781; entrez: entrez:4357
Formicacid	CYP3A7	ensembl:ENSG00000160870; kegg:1551
Formicacid	CYP3A7	uniprot:P24462; hmdb:HMDBP01557
Formicacid	CYP3A7-CYP3A51P	ensembl:ENSG00000282301; kegg:100861540
Choline	CHKB	hmdb:HMDBP00777; uniprot:Q9Y259; entrez: entrez:1120
Choline	CHKB	ensembl:ENSG00000100288; kegg:1120; uniprot:A0A024R4X4
Citrate	SRC	entrez: entrez:6714; uniprot:P12931; hmdb:HMDBP01147
Citrate	SRC	kegg:6714; ensembl:ENSG00000197122
Carnitine	SLC22A5	kegg:6584; ensembl:ENSG00000197375
Carnitine	SLC22A5	hmdb:HMDBP01612; uniprot:O76082
Creatine	SLC22A5	kegg:6584; ensembl:ENSG00000197375
Creatine	SLC22A5	hmdb:HMDBP01612; uniprot:O76082
L-Histidine	HARS	ensembl:ENSG00000170445; kegg:3035
L-Histidine	HARS	hmdb:HMDBP00645; uniprot:P12081
Ceramide	LCT	uniprot:P09848; hmdb:HMDBP00365
Ceramide	LCT	ensembl:ENSG00000115850; kegg:3938
D-Mannose	LCT	uniprot:P09848; hmdb:HMDBP00365
D-Mannose	LCT	ensembl:ENSG00000115850; kegg:3938
D-Glucose	LCT	uniprot:P09848; hmdb:HMDBP00365
D-Glucose	LCT	ensembl:ENSG00000115850; kegg:3938
L-Alanine	SCLY	uniprot:A0A0A0MQU4; ensembl:ENSG00000132330; kegg:51540; uniprot:Q59FK2; uniprot:B4DDP9
L-Alanine	Scly	entrez: entrez:51540
L-Alanine	SCLY	uniprot:Q96I15; hmdb:HMDBP04824
Pyruvate	SCLY	uniprot:A0A0A0MQU4; ensembl:ENSG00000132330; kegg:51540; uniprot:Q59FK2; uniprot:B4DDP9; uniprot:A0A0A0MQU4
Pyruvate	Scly	entrez: entrez:51540
Pyruvate	SCLY	uniprot:Q96I15; hmdb:HMDBP04824
Citrate	UCK2	kegg:7371; ensembl:ENSG00000143179; uniprot:A0A024R912
Citrate	UCK2	entrez: entrez:7371; hmdb:HMDBP02576; uniprot:Q9BZX2
D-Mannose	MAN1A2	ensembl:ENSG00000198162; kegg:10905
D-Mannose	MAN1A2	hmdb:HMDBP00868; uniprot:O60476
Sphingomyelin	DKFZp434L0435	hmdb:HMDBP11447; uniprot:Q9UFH6
Ceramide	DKFZp434L0435	hmdb:HMDBP11447; uniprot:Q9UFH6
Sphinganine	DKFZp434L0435	hmdb:HMDBP11447; uniprot:Q9UFH6
Choline	CHKA	kegg:1119; ensembl:ENSG00000110721
Choline	CHKA	uniprot:P35790; entrez: entrez:1119; hmdb:HMDBP00778
D-Mannose	LYZ	ensembl:ENSG00000090382; uniprot:B2R4C5; kegg:4069
D-Mannose	LYZ	hmdb:HMDBP01600; uniprot:P61626
L-Glutamine	GLUL	hmdb:HMDBP00670; entrez: entrez:2752; uniprot:P15104
L-Glutamine	GLUL	kegg:2752; ensembl:ENSG00000135821
Sphinganine	CERS6	kegg:253782; ensembl:ENSG00000172292
Sphinganine	CERS6	uniprot:Q6ZMG9; hmdb:HMDBP11633
Sphinganine	CerS6	entrez: entrez:253782
D-Mannose	GZMB	uniprot:Q67BC3; ensembl:ENSG00000100453; kegg:3002
D-Mannose	GZMB	uniprot:P10144; entrez: entrez:3002; hmdb:HMDBP02728
Ceramide	PIGB	kegg:9488; ensembl:ENSG00000069943
Ceramide	PIGB	uniprot:Q92521; hmdb:HMDBP07325
Sphingomyelin	PIGB	kegg:9488; ensembl:ENSG00000069943
Sphingomyelin	PIGB	uniprot:Q92521; hmdb:HMDBP07325
Sphinganine	PIGB	kegg:9488; ensembl:ENSG00000069943
Sphinganine	PIGB	uniprot:Q92521; hmdb:HMDBP07325
Ceramide	LARS2	uniprot:Q15031; hmdb:HMDBP00596
Ceramide	LARS2	kegg:23395; ensembl:ENSG00000011376
D-Mannose	MAN1B1	hmdb:HMDBP00869; uniprot:Q9UKM7
D-Mannose	MAN1B1	ensembl:ENSG00000177239; kegg:11253
Pyruvate	KYAT3	uniprot:B4DW13; ensembl:ENSG00000137944; kegg:56267
Pyruvate	CCBL2	uniprot:Q6YP21; hmdb:HMDBP08968
L-Proline	TRPM1	hmdb:HMDBP08080; uniprot:Q7Z4N2
Carnitine	XDH	kegg:7498; ensembl:ENSG00000158125
Carnitine	XDH	uniprot:P47989; entrez: entrez:7498; hmdb:HMDBP00181
Isocitrate	IDH3B	uniprot:O43837; entrez: entrez:3420; hmdb:HMDBP00897
Isocitrate	IDH3B	kegg:3420; ensembl:ENSG00000101365
Choline	SLC44A1	uniprot:A0A024R151; kegg:23446; ensembl:ENSG00000070214
Choline	SLC44A1	uniprot:Q8WWI5; hmdb:HMDBP02339
Sphingomyelin	PIGU	ensembl:ENSG00000101464; kegg:128869
Sphingomyelin	PIGU	hmdb:HMDBP07332; uniprot:Q9H490
Ceramide	PIGU	ensembl:ENSG00000101464; kegg:128869
Ceramide	PIGU	hmdb:HMDBP07332; uniprot:Q9H490
Sphinganine	PIGU	ensembl:ENSG00000101464; kegg:128869
Sphinganine	PIGU	hmdb:HMDBP07332; uniprot:Q9H490
Ceramide	ASAH1	entrez: entrez:427; uniprot:Q13510; hmdb:HMDBP01084
Ceramide	ASAH1	ensembl:ENSG00000104763; uniprot:A8K0B6; kegg:427; uniprot:Q53H01
Sphinganine	ASAH1	entrez: entrez:427; uniprot:Q13510; hmdb:HMDBP01084
Sphinganine	ASAH1	ensembl:ENSG00000104763; uniprot:A8K0B6; kegg:427; uniprot:Q53H01
Phosphatidylcholine	PTDSS1	ensembl:ENSG00000156471; kegg:9791
Phosphatidylcholine	PTDSS1	uniprot:P48651; hmdb:HMDBP02190
D-Mannose	LDLR	kegg:3949; ensembl:ENSG00000130164; uniprot:A0A024R7D5
D-Mannose	LDLR	hmdb:HMDBP02065; uniprot:P01130; entrez: entrez:3949
L-Lysine	WBP7	uniprot:Q9UMN6; hmdb:HMDBP09020
L-Lysine	KMT2B	kegg:9757; ensembl:ENSG00000272333
Pyruvate	LDHC	hmdb:HMDBP03578; entrez: entrez:3948; uniprot:P07864
Pyruvate	LDHC	uniprot:A0A140VKA7; ensembl:ENSG00000166796; kegg:3948
L-Lacticacid	LDHC	hmdb:HMDBP03578; entrez: entrez:3948; uniprot:P07864
L-Lacticacid	LDHC	uniprot:A0A140VKA7; ensembl:ENSG00000166796; kegg:3948
L-Lysine	PRDM2	uniprot:Q13029; hmdb:HMDBP01867
L-Lysine	PRDM2	ensembl:ENSG00000116731; kegg:7799
L-Histidine	HEMK1	uniprot:Q9Y5R4; hmdb:HMDBP11778
Choline	PCYT1A	hmdb:HMDBP00755; entrez: entrez:5130; uniprot:P49585
Choline	PCYT1A	ensembl:ENSG00000161217; uniprot:B4E322; kegg:5130
Choline	SLC44A3	kegg:126969; ensembl:ENSG00000143036
Choline	SLC44A3	uniprot:Q8N4M1; hmdb:HMDBP10796
Formicacid	CYP1A2	kegg:1544; ensembl:ENSG00000140505
Formicacid	CYP1A2	uniprot:P05177; entrez: entrez:1544; hmdb:HMDBP01560
D-Mannose	MAN1A1	ensembl:ENSG00000111885; kegg:4121
D-Mannose	MAN1A1	hmdb:HMDBP00870; uniprot:P33908
Carnitine	CPT2	uniprot:P23786; hmdb:HMDBP00311; entrez: entrez:1376
Carnitine	CPT2	kegg:1376; ensembl:ENSG00000157184; uniprot:A0A140VK13
Formicacid	CYP2D6	uniprot:Q6NWU0; hmdb:HMDBP09335
Citrate	AKR1B1	hmdb:HMDBP00088; uniprot:P15121
Citrate	AKR1B1	ensembl:ENSG00000085662; kegg:231; uniprot:A0A024R7A8
Citrate	ALR2	entrez: entrez:231
Pyruvate	LDHAL6A	hmdb:HMDBP00893; uniprot:Q6ZMR3
Pyruvate	LDHAL6A	kegg:160287; ensembl:ENSG00000166800
L-Lacticacid	LDHAL6A	hmdb:HMDBP00893; uniprot:Q6ZMR3
L-Lacticacid	LDHAL6A	kegg:160287; ensembl:ENSG00000166800
D-Mannose	HK3	uniprot:P52790; entrez: entrez:3101; hmdb:HMDBP00212
D-Mannose	HK3	uniprot:A0A024R7R1; ensembl:ENSG00000160883; kegg:3101
D-Glucose	HK3	uniprot:P52790; entrez: entrez:3101; hmdb:HMDBP00212
D-Glucose	HK3	uniprot:A0A024R7R1; ensembl:ENSG00000160883; kegg:3101
D-Glucose	MOGS	kegg:7841; ensembl:ENSG00000115275
D-Glucose	MOGS	hmdb:HMDBP11831; uniprot:Q13724
L-Phenylalanine	PAH	hmdb:HMDBP00280; uniprot:P00439
L-Phenylalanine	PAH	kegg:5053; ensembl:ENSG00000171759; uniprot:A0A024RBG4
Carnitine	MPO	uniprot:P05164; entrez: entrez:4353; hmdb:HMDBP00282
Carnitine	MPO	kegg:4353; ensembl:ENSG00000005381
L-Phenylalanine	MPO	uniprot:P05164; entrez: entrez:4353; hmdb:HMDBP00282
L-Phenylalanine	MPO	kegg:4353; ensembl:ENSG00000005381
L-Histidine	HDC	ensembl:ENSG00000140287; kegg:3067
L-Histidine	HDC	entrez: entrez:3067; uniprot:P19113; hmdb:HMDBP00885
Pyruvate	HDC	ensembl:ENSG00000140287; kegg:3067
Pyruvate	HDC	entrez: entrez:3067; uniprot:P19113; hmdb:HMDBP00885
Carnitine	SLC22A4	uniprot:Q9H015; hmdb:HMDBP02439
Carnitine	SLC22A4	ensembl:ENSG00000197208; kegg:6583
Pyruvate	AGXT	hmdb:HMDBP00789; uniprot:P21549; entrez: entrez:189
Pyruvate	AGXT	ensembl:ENSG00000172482; kegg:189
L-Alanine	AGXT	hmdb:HMDBP00789; uniprot:P21549; entrez: entrez:189
L-Alanine	AGXT	ensembl:ENSG00000172482; kegg:189
Ceramide	SGPL1	uniprot:O95470; hmdb:HMDBP01052
Ceramide	SGPL1	ensembl:ENSG00000166224; kegg:8879
Creatine	CKB	uniprot:V9HWH2; ensembl:ENSG00000166165; kegg:1152
Creatine	CKB	hmdb:HMDBP00720; entrez: entrez:1152; uniprot:P12277
L-Alanine	SLC36A1	ensembl:ENSG00000123643; kegg:206358
L-Alanine	SLC36A1	hmdb:HMDBP03592; uniprot:Q7Z2H8
L-Proline	PYCR2	ensembl:ENSG00000143811; uniprot:A0A0S2Z5U6; kegg:29920
L-Proline	PYCR2	uniprot:Q96C36; hmdb:HMDBP00305
L-Proline	PPIA	ensembl:ENSG00000196262; uniprot:V9HWF5; kegg:5478
L-Proline	PPIA	uniprot:P62937; entrez: entrez:5478; hmdb:HMDBP10691
L-Glutamine	PFAS	uniprot:O15067; hmdb:HMDBP00853
L-Glutamine	PFAS	kegg:5198; ensembl:ENSG00000178921; uniprot:A8K9T9; uniprot:Q6P4B4
D-Mannose	CD209	uniprot:B2R907; ensembl:ENSG00000090659; kegg:30835
D-Mannose	CD209	uniprot:Q9NNX6; hmdb:HMDBP02780
Guanidoaceticacid	GATM	kegg:2628; ensembl:ENSG00000171766; uniprot:A0A140VK19
Guanidoaceticacid	GATM	uniprot:P50440; hmdb:HMDBP00463
Creatine	GATM	kegg:2628; ensembl:ENSG00000171766; uniprot:A0A140VK19
Creatine	GATM	uniprot:P50440; hmdb:HMDBP00463
L-Phenylalanine	PRDX6	hmdb:HMDBP00281; uniprot:P30041
Sphingomyelin	PIGT	kegg:51604; ensembl:ENSG00000124155
Sphingomyelin	PIGT	uniprot:Q969N2; hmdb:HMDBP07331
Ceramide	PIGT	kegg:51604; ensembl:ENSG00000124155
Ceramide	PIGT	uniprot:Q969N2; hmdb:HMDBP07331
Sphinganine	PIGT	kegg:51604; ensembl:ENSG00000124155
Sphinganine	PIGT	uniprot:Q969N2; hmdb:HMDBP07331
Ceramide	CROT	hmdb:HMDBP00307; uniprot:Q9UKG9
Ceramide	CROT	ensembl:ENSG00000005469; kegg:54677
Carnitine	CROT	hmdb:HMDBP00307; uniprot:Q9UKG9
Carnitine	CROT	ensembl:ENSG00000005469; kegg:54677
Isocitrate	IDH3G	entrez: entrez:3421; uniprot:P51553; hmdb:HMDBP00900
Isocitrate	IDH3G	ensembl:ENSG00000067829; kegg:3421
Choline	SLC44A4	kegg:80736; uniprot:A0A140VJH4; ensembl:ENSG00000204385
Choline	SLC44A4	uniprot:Q53GD3; hmdb:HMDBP10794
Pyruvate	SLC16A8	uniprot:O95907; hmdb:HMDBP01108
Choline	SLC5A7	kegg:60482; ensembl:ENSG00000115665; uniprot:B2RCU2
Choline	SLC5A7	uniprot:Q9GZV3; hmdb:HMDBP02379; entrez: entrez:60482
Ceramide	CERS5	uniprot:Q8N5B7; hmdb:HMDBP10978
Ceramide	CerS5	entrez: entrez:91012
Ceramide	CERS5	kegg:91012; ensembl:ENSG00000139624
Sphinganine	CERS5	uniprot:Q8N5B7; hmdb:HMDBP10978
Sphinganine	CerS5	entrez: entrez:91012
Sphinganine	CERS5	kegg:91012; ensembl:ENSG00000139624
Citrate	RNASE3	kegg:6037; ensembl:ENSG00000169397
Citrate	RNASE3	hmdb:HMDBP02316; uniprot:P12724
L-Proline	L3HYPDH	hmdb:HMDBP10688; uniprot:Q96EM0
L-Proline	L3HYPDH	kegg:112849; ensembl:ENSG00000126790
L-Alanine	AGXT2L2	uniprot:Q8IUZ5; hmdb:HMDBP08966
L-Alanine	PHYKPL	kegg:85007; ensembl:ENSG00000175309
Sphingomyelin	GBA2	uniprot:Q9HCG7; hmdb:HMDBP09169; entrez: entrez:57704
Sphingomyelin	GBA2	ensembl:ENSG00000070610; kegg:57704
D-Glucose	GBA2	uniprot:Q9HCG7; hmdb:HMDBP09169; entrez: entrez:57704
D-Glucose	GBA2	ensembl:ENSG00000070610; kegg:57704
Ceramide	GBA2	uniprot:Q9HCG7; hmdb:HMDBP09169; entrez: entrez:57704
Ceramide	GBA2	ensembl:ENSG00000070610; kegg:57704
Sphinganine	GBA2	uniprot:Q9HCG7; hmdb:HMDBP09169; entrez: entrez:57704
Sphinganine	GBA2	ensembl:ENSG00000070610; kegg:57704
D-Mannose	HK2	uniprot:P52789; hmdb:HMDBP00213; entrez: entrez:3099
D-Mannose	HK2	kegg:3099; ensembl:ENSG00000159399
D-Glucose	HK2	uniprot:P52789; hmdb:HMDBP00213; entrez: entrez:3099
D-Glucose	HK2	kegg:3099; ensembl:ENSG00000159399
Pyruvate	LDHB	hmdb:HMDBP03577; entrez: entrez:3945; uniprot:P07195
Pyruvate	LDHB	uniprot:Q5U077; ensembl:ENSG00000111716; kegg:3945
L-Lacticacid	LDHB	hmdb:HMDBP03577; entrez: entrez:3945; uniprot:P07195
L-Lacticacid	LDHB	uniprot:Q5U077; ensembl:ENSG00000111716; kegg:3945
D-Glucose	G6PC2	hmdb:HMDBP05100; uniprot:Q9NQR9
D-Glucose	G6PC2	ensembl:ENSG00000152254; kegg:57818
Pyruvate	AGXT2	hmdb:HMDBP00396; uniprot:Q9BYV1
Pyruvate	AGXT2	ensembl:ENSG00000113492; kegg:64902
L-Alanine	AGXT2	hmdb:HMDBP00396; uniprot:Q9BYV1
L-Alanine	AGXT2	ensembl:ENSG00000113492; kegg:64902
L-Proline	PPIF	hmdb:HMDBP10690; uniprot:P30405
L-Proline	PPIF	uniprot:A0A024QZS4; kegg:10105; ensembl:ENSG00000108179
D-Mannose	SERPINC1	ensembl:ENSG00000117601; kegg:462; uniprot:A0A024R944
D-Mannose	SERPINC1	entrez: entrez:462; hmdb:HMDBP01724; uniprot:P01008
L-Alanine	GPT	entrez: entrez:2875; hmdb:HMDBP00850; uniprot:P24298
L-Alanine	GPT	kegg:2875; ensembl:ENSG00000167701
Pyruvate	GPT	entrez: entrez:2875; hmdb:HMDBP00850; uniprot:P24298
Pyruvate	GPT	kegg:2875; ensembl:ENSG00000167701
Sphinganine	ACER3	uniprot:Q9NUN7; hmdb:HMDBP07413
Sphinganine	ACER3	kegg:55331; ensembl:ENSG00000078124
L-Glutamine	TGM4	hmdb:HMDBP00681; uniprot:P49221
Choline	PLD4	uniprot:B4DI07; ensembl:ENSG00000166428; uniprot:B4DJQ6; kegg:122618
Choline	PLD4	uniprot:Q96BZ4; hmdb:HMDBP07292
L-Lysine	KMT2C	ensembl:ENSG00000055609; kegg:58508
L-Lysine	MLL3	uniprot:Q8NEZ4; hmdb:HMDBP03179
Sphingomyelin	SMPD2	kegg:6610; ensembl:ENSG00000135587
Sphingomyelin	SMPD2	entrez: entrez:6610; uniprot:O60906; hmdb:HMDBP01090
Ceramide	SMPD2	kegg:6610; ensembl:ENSG00000135587
Ceramide	SMPD2	entrez: entrez:6610; uniprot:O60906; hmdb:HMDBP01090
L-Phenylalanine	EPX	kegg:8288; ensembl:ENSG00000121053
L-Phenylalanine	EPX	hmdb:HMDBP00285; uniprot:P11678
D-Mannose	MAN2B2	kegg:23324; ensembl:ENSG00000013288
D-Mannose	MAN2B2	uniprot:Q9Y2E5; hmdb:HMDBP11811
L-Glutamine	GLYATL1	hmdb:HMDBP07350; uniprot:Q969I3
Glycocholicacid	GLYATL1	hmdb:HMDBP07350; uniprot:Q969I3
L-Phenylalanine	GLYATL1	hmdb:HMDBP07350; uniprot:Q969I3
L-Histidine	WBSCR22	uniprot:O43709; hmdb:HMDBP12007
Citrate	SLCO2B1	uniprot:O94956; hmdb:HMDBP02021
Choline	ADH1B	ensembl:ENSG00000196616; uniprot:V9HW50; kegg:125
Choline	ADH1B	entrez: entrez:125; uniprot:P00325; hmdb:HMDBP00782
Sphingomyelin	SMPD3	kegg:55512; ensembl:ENSG00000103056; uniprot:A8K0T6
Sphingomyelin	SMPD3	uniprot:Q9NY59; hmdb:HMDBP06631
Ceramide	SMPD3	kegg:55512; ensembl:ENSG00000103056; uniprot:A8K0T6
Ceramide	SMPD3	uniprot:Q9NY59; hmdb:HMDBP06631
Phosphatidylcholine	SMPD3	kegg:55512; ensembl:ENSG00000103056; uniprot:A8K0T6
Phosphatidylcholine	SMPD3	uniprot:Q9NY59; hmdb:HMDBP06631
L-Alanine	AARS	hmdb:HMDBP00625; uniprot:P49588
L-Alanine	AARS	ensembl:ENSG00000090861; kegg:16
L-Glutamine	CTPS1	ensembl:ENSG00000171793; kegg:1503
L-Glutamine	CTPS1	uniprot:P17812; hmdb:HMDBP00676; entrez: entrez:1503
D-Glucose	ADPGK	uniprot:Q9BRR6; hmdb:HMDBP00369
D-Glucose	ADPGK	kegg:83440; ensembl:ENSG00000159322
Pyruvate	SLC16A5	uniprot:O15375; hmdb:HMDBP01113
Sphingomyelin	CD1D	uniprot:P15813; hmdb:HMDBP02783
Sphingomyelin	CD1D	kegg:912; ensembl:ENSG00000158473
Ceramide	CD1D	uniprot:P15813; hmdb:HMDBP02783
Ceramide	CD1D	kegg:912; ensembl:ENSG00000158473
Sphinganine	CD1D	uniprot:P15813; hmdb:HMDBP02783
Sphinganine	CD1D	kegg:912; ensembl:ENSG00000158473
L-Lysine	MLL2	uniprot:O14686; hmdb:HMDBP09019
L-Lysine	KMT2D	kegg:8085; uniprot:Q6PIA1; uniprot:Q59FG6; ensembl:ENSG00000167548
D-Glucose	SI	kegg:6476; ensembl:ENSG00000090402
D-Glucose	SI	uniprot:P14410; hmdb:HMDBP00290
Formicacid	CYP4X1	uniprot:Q8N118; hmdb:HMDBP01552
Formicacid	CYP4X1	ensembl:ENSG00000186377; kegg:260293
L-Phenylalanine	TH	kegg:7054; ensembl:ENSG00000180176; uniprot:P78428
L-Phenylalanine	TH	entrez: entrez:7054; uniprot:P07101; hmdb:HMDBP00273
Formicacid	CYP2B6	kegg:1555; ensembl:ENSG00000197408
Formicacid	CYP2B6	hmdb:HMDBP01553; entrez: entrez:1555; uniprot:P20813
Sphingomyelin	PIGP	uniprot:P57054; hmdb:HMDBP00943
Sphingomyelin	PIGP	ensembl:ENSG00000185808; kegg:51227; uniprot:A0A0C4DH71
Ceramide	PIGP	uniprot:P57054; hmdb:HMDBP00943
Ceramide	PIGP	ensembl:ENSG00000185808; kegg:51227; uniprot:A0A0C4DH71
Sphinganine	PIGP	uniprot:P57054; hmdb:HMDBP00943
Sphinganine	PIGP	ensembl:ENSG00000185808; kegg:51227; uniprot:A0A0C4DH71
L-Proline	EPRS	uniprot:P07814; entrez: entrez:2058; hmdb:HMDBP00567
L-Proline	EPRS	kegg:2058; ensembl:ENSG00000136628
Formicacid	CYP2A6	kegg:1548; ensembl:ENSG00000255974
Formicacid	CYP2A6	uniprot:P11509; hmdb:HMDBP01567; entrez: entrez:1548
D-Mannose	IGF1R	uniprot:P08069; entrez: entrez:3480; hmdb:HMDBP01188
D-Mannose	IGF1R	kegg:3480; ensembl:ENSG00000140443; kegg:3480; ensembl:ENSG00000140443
L-Lysine	SETD7	uniprot:Q8WTS6; hmdb:HMDBP00404
L-Lysine	SETD7	kegg:80854; ensembl:ENSG00000145391
Pyruvate	ADCY7	kegg:113; ensembl:ENSG00000121281; uniprot:Q86YI0
Pyruvate	ADCY7	hmdb:HMDBP00704; uniprot:P51828; entrez: entrez:113
Glycocholicacid	GLYATL2	hmdb:HMDBP07351; uniprot:Q8WU03
L-Phenylalanine	GLYATL2	hmdb:HMDBP07351; uniprot:Q8WU03
D-Glucose	GBA3	ensembl:ENSG00000249948; kegg:57733; uniprot:A8K9N1
D-Glucose	GBA3	hmdb:HMDBP03061; uniprot:Q9H227
Sphinganine	SGPP2	ensembl:ENSG00000163082; kegg:130367
Sphinganine	SGPP2	hmdb:HMDBP11558; uniprot:Q8IWX5; entrez: entrez:130367
Sphingomyelin	PIGO	kegg:84720; ensembl:ENSG00000165282
Sphingomyelin	PIGO	uniprot:Q8TEQ8; hmdb:HMDBP07329
Ceramide	PIGO	kegg:84720; ensembl:ENSG00000165282
Ceramide	PIGO	uniprot:Q8TEQ8; hmdb:HMDBP07329
Sphinganine	PIGO	kegg:84720; ensembl:ENSG00000165282
Sphinganine	PIGO	uniprot:Q8TEQ8; hmdb:HMDBP07329
Pyruvate	SLCO2A1	uniprot:Q92959; hmdb:HMDBP05558
Pyruvate	ADCY3	entrez: entrez:109; uniprot:O60266; hmdb:HMDBP00710
Pyruvate	ADCY3	kegg:109; ensembl:ENSG00000138031
Choline	GPCPD1	hmdb:HMDBP11753; uniprot:Q9NPB8
Choline	GPCPD1	ensembl:ENSG00000125772; kegg:56261
Isocitrate	IDH2	ensembl:ENSG00000182054; kegg:3418
Isocitrate	IDH2	uniprot:P48735; entrez: entrez:3418; hmdb:HMDBP00896
L-Phenylalanine	LPO	ensembl:ENSG00000167419; kegg:4025
L-Phenylalanine	LPO	hmdb:HMDBP00279; uniprot:P22079
Citrate	GNMT	ensembl:ENSG00000124713; kegg:27232; uniprot:V9HW60
Citrate	GNMT	uniprot:Q14749; hmdb:HMDBP00403
Sphingomyelin	GBGT1	uniprot:Q8N5D6; hmdb:HMDBP00434
Sphingomyelin	GBGT1	kegg:26301; ensembl:ENSG00000148288; uniprot:J7Q0Z1
Ceramide	GBGT1	uniprot:Q8N5D6; hmdb:HMDBP00434
Ceramide	GBGT1	kegg:26301; ensembl:ENSG00000148288; uniprot:J7Q0Z1
Sphinganine	GBGT1	uniprot:Q8N5D6; hmdb:HMDBP00434
Sphinganine	GBGT1	kegg:26301; ensembl:ENSG00000148288; uniprot:J7Q0Z1
Betaine	BHMT	entrez: entrez:635; hmdb:HMDBP00559; uniprot:Q93088
Betaine	BHMT	kegg:635; uniprot:V9HWA4; ensembl:ENSG00000145692
Citrate	BHMT	entrez: entrez:635; hmdb:HMDBP00559; uniprot:Q93088
Citrate	BHMT	kegg:635; uniprot:V9HWA4; ensembl:ENSG00000145692
Chenodeoxycholicacid	AKR1C2	hmdb: hmdb:HMDBP00387; uniprot: uniprot:P52895
Chenodeoxycholicacid	AKR1C2	ensembl: ensembl:ENSG00000151632; kegg: kegg:1646
Chenodeoxycholicacid	SLCO1B1	uniprot: uniprot:Q05CV5; uniprot: uniprot:A0A024RAU7; kegg: kegg:10599; ensembl: ensembl:ENSG00000134538
Chenodeoxycholicacid	SLCO1B1	hmdb: hmdb:HMDBP00454; entrez: entrez:10599; uniprot: uniprot:Q9Y6L6
Chenodeoxycholicacid	SLCO4A1	uniprot: uniprot:Q96BD0; hmdb: hmdb:HMDBP03202
Chenodeoxycholicacid	AKR1C1	uniprot: uniprot:Q04828; hmdb: hmdb:HMDBP00386
Chenodeoxycholicacid	AKR1C1	kegg: kegg:1645; ensembl: ensembl:ENSG00000187134
Chenodeoxycholicacid	ABCC3	entrez: entrez:8714; uniprot: uniprot:O15438; hmdb: hmdb:HMDBP02040
Chenodeoxycholicacid	ABCC3	ensembl: ensembl:ENSG00000108846; kegg: kegg:8714
Chenodeoxycholicacid	SLC27A5	ensembl: ensembl:ENSG00000083807; kegg: kegg:10998
Chenodeoxycholicacid	SLC27A5	entrez: entrez:10998; uniprot: uniprot:Q9Y2P5; hmdb: hmdb:HMDBP03055
Chenodeoxycholicacid	SLCO1B3	ensembl: ensembl:ENSG00000111700; kegg: kegg:28234; uniprot: uniprot:B3KP78
Chenodeoxycholicacid	SLCO1B3	uniprot: uniprot:Q9NPD5; hmdb: hmdb:HMDBP00446
Chenodeoxycholicacid	ACOT8	ensembl: ensembl:ENSG00000101473; kegg: kegg:10005
Chenodeoxycholicacid	ACOT8	hmdb: hmdb:HMDBP01049; uniprot: uniprot:O14734
Chenodeoxycholicacid	FABP6	kegg: kegg:2172; ensembl: ensembl:ENSG00000170231
Chenodeoxycholicacid	FABP6	uniprot: uniprot:P51161; hmdb: hmdb:HMDBP09119
Chenodeoxycholicacid	SLC10A2	hmdb: hmdb:HMDBP02461; uniprot: uniprot:Q12908
Chenodeoxycholicacid	SLC10A2	kegg: kegg:6555; ensembl: ensembl:ENSG00000125255
Chenodeoxycholicacid	SLC10A1	uniprot: uniprot:Q14973; entrez: entrez:6554; hmdb: hmdb:HMDBP02550
Chenodeoxycholicacid	SLC10A1	ensembl: ensembl:ENSG00000100652; kegg: kegg:6554; uniprot: uniprot:B2RA41
Chenodeoxycholicacid	ABCB11	ensembl: ensembl:ENSG00000073734; kegg: kegg:8647
Chenodeoxycholicacid	ABCB11	entrez: entrez:8647; hmdb: hmdb:HMDBP02052; uniprot: uniprot:O95342
Chenodeoxycholicacid	SLCO1A2	uniprot: uniprot:P46721; hmdb: hmdb:HMDBP02683
Chenodeoxycholicacid	SLCO1A2	ensembl: ensembl:ENSG00000084453; uniprot: uniprot:A0A024RAT5; kegg: kegg:6579

## Sheet: Metabolite-genes
Type of metabolite	Metabolite	Gene list		Unique genes(Total 517 genes)		Metabolites
Amino acid	L-Alanine	AARS		AARS		Betaine
Amino acid	L-Alanine	AARS2		AARS2		Carnitine
Amino acid	L-Lysine	AASS		AASS		Ceramide
Amino acid	L-Alanine	ABAT		ABAT		Choline
Glycolysis and TCA cycle	Pyruvate	ABAT		ABCA7		Citrate
Ceramide/Sphingomyelin	Ceramide	ABCA7		ABCB11		Creatine
Amino acid	L-Isoleucine	ACADSB		ABCC3		D-Glucose
Amino acid	L-Phenylalanine	ACE2		ACADSB		Dimethylamine
Ceramide/Sphingomyelin	Ceramide	ACER1		ACE2		D-Mannose
Ceramide/Sphingomyelin	Sphinganine	ACER1		ACER1		Formicacid
Ceramide/Sphingomyelin	Ceramide	ACER2		ACER2		Glycocholic acid
Ceramide/Sphingomyelin	Sphinganine	ACER2		ACER3		Guanidoaceticacid
Ceramide/Sphingomyelin	Sphinganine	ACER3		ACHE		Isocitrate
Phospholipid	Choline	ACHE		ACLY		L-Alanine
Glycolysis and TCA cycle	Citrate	ACLY		ACO1		L-Glutamine
Glycolysis and TCA cycle	Citrate	ACO1		ACO2		L-Histidine
Glycolysis and TCA cycle	Isocitrate	ACO1		ACOT8		L-Isoleucine
Glycolysis and TCA cycle	Citrate	ACO2		ACPP		L-Lacticacid
Glycolysis and TCA cycle	Isocitrate	ACO2		ACY3		L-Lysine
Carbohydrate	D-Mannose	ACPP		ADCY1		L-Phenylalanine
Small metabolite/intermediate	Formicacid	ACY3		ADCY2		L-Proline
Glycolysis and TCA cycle	Pyruvate	ADCY1		ADCY3		L-Valine
Glycolysis and TCA cycle	Pyruvate	ADCY2		ADCY4		Phosphatidylcholine
Glycolysis and TCA cycle	Pyruvate	ADCY3		ADCY5		Pyruvate
Glycolysis and TCA cycle	Pyruvate	ADCY4		ADCY6		Sphinganine
Glycolysis and TCA cycle	Pyruvate	ADCY5		ADCY7		Sphingomyelin
Glycolysis and TCA cycle	Pyruvate	ADCY6		ADCY8		Chenodeoxycholic acid
Glycolysis and TCA cycle	Pyruvate	ADCY7		ADCY9		CA-19-9
Glycolysis and TCA cycle	Pyruvate	ADCY8		ADH1A		α-N-Acetyl glutamine
Glycolysis and TCA cycle	Pyruvate	ADCY9		ADH1B		Acetone
Phospholipid	Choline	ADH1A		ADH1C
Phospholipid	Choline	ADH1B		ADH5
Phospholipid	Choline	ADH1C		ADH6
Phospholipid	Choline	ADH5		ADH7
Phospholipid	Choline	ADH6		ADI1
Phospholipid	Choline	ADH7		ADPGK
Small metabolite/intermediate	Formicacid	ADI1		AFMID
Carbohydrate	D-Glucose	ADPGK		AGL
Small metabolite/intermediate	Formicacid	AFMID		AGXT
Carbohydrate	D-Glucose	AGL		AGXT2
Amino acid	L-Alanine	AGXT		AGXT2L2
Glycolysis and TCA cycle	Pyruvate	AGXT		AKR1B1
Amino acid	L-Alanine	AGXT2		AKR1C1
Glycolysis and TCA cycle	Pyruvate	AGXT2		AKR1C2
Amino acid	L-Alanine	AGXT2L2		ALG3
Glycolysis and TCA cycle	Citrate	AKR1B1		alpha-galactosidaseA
Carbohydrate	D-Mannose	ALG3		ALR2
Carbohydrate	D-Glucose	alpha-galactosidaseA		AMD1
Carbohydrate	D-Mannose	alpha-galactosidaseA		AMY2B
Glycolysis and TCA cycle	Citrate	ALR2		ANG
Glycolysis and TCA cycle	Pyruvate	AMD1		APOH
Carbohydrate	D-Mannose	AMY2B		APRT
Glycolysis and TCA cycle	Citrate	ANG		ASAH1
Carbohydrate	D-Mannose	APOH		ASAH2
Glycolysis and TCA cycle	Citrate	APRT		ASAH2C
Ceramide/Sphingomyelin	Ceramide	ASAH1		ASNS
Ceramide/Sphingomyelin	Sphinganine	ASAH1		ASPA
Ceramide/Sphingomyelin	Ceramide	ASAH2		ATP8A1
Ceramide/Sphingomyelin	Ceramide	ASAH2C		AUH
Amino acid	L-Glutamine	ASNS		AZGP1
Small metabolite/intermediate	Formicacid	ASPA		B3GALT5
Phospholipid	Phosphatidylcholine	ATP8A1		B3GAT1
Ceramide/Sphingomyelin	Ceramide	AUH		B3GNT5
Carbohydrate	D-Mannose	AZGP1		B4GALT1
Ceramide/Sphingomyelin	Ceramide	B3GALT5		B4GALT2
Ceramide/Sphingomyelin	Sphinganine	B3GALT5		BAAT
Ceramide/Sphingomyelin	Sphingomyelin	B3GALT5		BBOX1
Ceramide/Sphingomyelin	Sphingomyelin	B3GAT1		BCAT1
Ceramide/Sphingomyelin	Ceramide	B3GNT5		BCAT2
Ceramide/Sphingomyelin	Sphinganine	B3GNT5		BCHE
Ceramide/Sphingomyelin	Sphingomyelin	B3GNT5		BHMT
Carbohydrate	D-Glucose	B4GALT1		BHMT2
Carbohydrate	D-Glucose	B4GALT2		BTD
Bile acid	Glycocholicacid	BAAT		C1R
Fatty acid transport	Carnitine	BBOX1		CAD
Amino acid	L-Isoleucine	BCAT1		CARNS1
Amino acid	L-Valine	BCAT1		CCBL1
Amino acid	L-Isoleucine	BCAT2		CCBL2
Amino acid	L-Valine	BCAT2		CD1A
Phospholipid	Choline	BCHE		CD1B
Carbohydrate	D-Mannose	BCHE		CD1C
Small metabolite/intermediate	Betaine	BHMT		CD1D
Glycolysis and TCA cycle	Citrate	BHMT		CD1E
Small metabolite/intermediate	Betaine	BHMT2		CD209
Amino acid	L-Lysine	BTD		CEPT1
Carbohydrate	D-Mannose	C1R		CERK
Amino acid	L-Glutamine	CAD		CERS1
Amino acid	L-Histidine	CARNS1		CERS2
Amino acid	L-Lysine	CARNS1		CerS3
Amino acid	L-Glutamine	CCBL1		CERS4
Amino acid	L-Phenylalanine	CCBL1		CERS5
Glycolysis and TCA cycle	Pyruvate	CCBL1		CERS6
Glycolysis and TCA cycle	Pyruvate	CCBL2		CES1
Ceramide/Sphingomyelin	Ceramide	CD1A		CHAT
Ceramide/Sphingomyelin	Sphinganine	CD1A		CHDH
Ceramide/Sphingomyelin	Sphingomyelin	CD1A		CHKA
Ceramide/Sphingomyelin	Ceramide	CD1B		CHKB
Ceramide/Sphingomyelin	Sphinganine	CD1B		CKB
Ceramide/Sphingomyelin	Sphingomyelin	CD1B		CKM
Ceramide/Sphingomyelin	Ceramide	CD1C		CKMT1A
Ceramide/Sphingomyelin	Sphinganine	CD1C		CKMT1B
Ceramide/Sphingomyelin	Sphingomyelin	CD1C		CKMT2
Ceramide/Sphingomyelin	Ceramide	CD1D		CLYBL
Ceramide/Sphingomyelin	Sphinganine	CD1D		CNDP1
Ceramide/Sphingomyelin	Sphingomyelin	CD1D		COL4A3BP
Ceramide/Sphingomyelin	Ceramide	CD1E		COMT
Ceramide/Sphingomyelin	Sphinganine	CD1E		CPB1
Ceramide/Sphingomyelin	Sphingomyelin	CD1E		CPD
Carbohydrate	D-Mannose	CD209		CPT1A
Phospholipid	Choline	CEPT1		CPT1A(liver)
Ceramide/Sphingomyelin	Ceramide	CERK		CPT1B
Ceramide/Sphingomyelin	Ceramide	CERS1		CPT1B(muscle)
Ceramide/Sphingomyelin	Sphinganine	CERS1		CPT1C
Ceramide/Sphingomyelin	Sphinganine	CERS2		CPT1C(brain)
Ceramide/Sphingomyelin	Sphinganine	CerS3		CPT2
Ceramide/Sphingomyelin	Sphinganine	CERS4		CRAT
Ceramide/Sphingomyelin	Ceramide	CERS5		CROT
Ceramide/Sphingomyelin	Sphinganine	CERS5		CS
Ceramide/Sphingomyelin	Sphinganine	CERS6		CSF2RB
Fatty acid transport	Carnitine	CES1		CTDSP1
Carbohydrate	D-Mannose	CES1		CTH
Phospholipid	Choline	CHAT		CTPS1
Small metabolite/intermediate	Betaine	CHDH		CTPS2
Phospholipid	Choline	CHDH		CTSD
Phospholipid	Choline	CHKA		CYP19A1
Phospholipid	Choline	CHKB		CYP1A1
Small metabolite/intermediate	Creatine	CKB		CYP1A2
Small metabolite/intermediate	Creatine	CKM		CYP1B1
Small metabolite/intermediate	Creatine	CKMT1A		CYP2A13
Small metabolite/intermediate	Creatine	CKMT1B		CYP2A6
Small metabolite/intermediate	Creatine	CKMT2		CYP2A7
Glycolysis and TCA cycle	Citrate	CLYBL		CYP2B6
Glycolysis and TCA cycle	Citrate	CNDP1		CYP2C18
Amino acid	L-Histidine	CNDP1		CYP2C19
Ceramide/Sphingomyelin	Ceramide	COL4A3BP		CYP2C8
Amino acid	L-Valine	COMT		CYP2C9
Glycolysis and TCA cycle	Citrate	CPB1		CYP2D6
Carbohydrate	D-Mannose	CPD		CYP2E1
Fatty acid transport	Carnitine	CPT1A		CYP2F1
Fatty acid transport	Carnitine	CPT1A(liver)		CYP2J2
Fatty acid transport	Carnitine	CPT1B		CYP2S1
Fatty acid transport	Carnitine	CPT1B(muscle)		CYP3A4
Fatty acid transport	Carnitine	CPT1C		CYP3A43
Fatty acid transport	Carnitine	CPT1C(brain)		CYP3A5
Fatty acid transport	Carnitine	CPT2		CYP3A7
Fatty acid transport	Carnitine	CRAT		CYP3A7-CYP3A51P
Fatty acid transport	Carnitine	CROT		CYP4B1
Ceramide/Sphingomyelin	Ceramide	CROT		CYP4X1
Glycolysis and TCA cycle	Citrate	CS		CYP4Z1
Carbohydrate	D-Mannose	CSF2RB		CYP51A1
Glycolysis and TCA cycle	Citrate	CTDSP1		DAO
Glycolysis and TCA cycle	Pyruvate	CTH		DDAH1
Amino acid	L-Glutamine	CTPS1		DDAH2
Amino acid	L-Glutamine	CTPS2		DDC
Carbohydrate	D-Mannose	CTSD		DGKD
Small metabolite/intermediate	Formicacid	CYP19A1		DGKG
Small metabolite/intermediate	Formicacid	CYP1A1		DKFZp434L0435
Small metabolite/intermediate	Formicacid	CYP1A2		DLAT
Small metabolite/intermediate	Formicacid	CYP1B1		DLD
Small metabolite/intermediate	Formicacid	CYP2A13		DNASE1
Small metabolite/intermediate	Formicacid	CYP2A6		DOT1L
Small metabolite/intermediate	Formicacid	CYP2A7		DPP4
Small metabolite/intermediate	Formicacid	CYP2B6		EGLN1
Small metabolite/intermediate	Formicacid	CYP2C18		EGLN2
Small metabolite/intermediate	Formicacid	CYP2C19		EGLN3
Small metabolite/intermediate	Formicacid	CYP2C8		EHMT1
Small metabolite/intermediate	Formicacid	CYP2C9		EHMT2
Small metabolite/intermediate	Formicacid	CYP2D6		ENPP7
Small metabolite/intermediate	Formicacid	CYP2E1		EPRS
Small metabolite/intermediate	Formicacid	CYP2F1		EPX
Small metabolite/intermediate	Formicacid	CYP2J2		ERK
Small metabolite/intermediate	Formicacid	CYP2S1		ESD
Small metabolite/intermediate	Formicacid	CYP3A4		EZH2
Small metabolite/intermediate	Formicacid	CYP3A43		F13A1
Small metabolite/intermediate	Formicacid	CYP3A5		FABP6
Small metabolite/intermediate	Formicacid	CYP3A7		FAHD1
Small metabolite/intermediate	Formicacid	CYP3A7-CYP3A51P		FARS2
Small metabolite/intermediate	Formicacid	CYP4B1		FARSA
Small metabolite/intermediate	Formicacid	CYP4X1		FARSB
Small metabolite/intermediate	Formicacid	CYP4Z1		FARSLA
Small metabolite/intermediate	Formicacid	CYP51A1		FVT1
Glycolysis and TCA cycle	Pyruvate	DAO		G6PC
Small metabolite/intermediate	Dimethylamine	DDAH1		G6PC2
Small metabolite/intermediate	Dimethylamine	DDAH2		G6PC3
Amino acid	L-Histidine	DDC		GAA
Amino acid	L-Phenylalanine	DDC		GALC
Phospholipid	Phosphatidylcholine	DGKD		GALNT1
Phospholipid	Phosphatidylcholine	DGKG		GAMT
Ceramide/Sphingomyelin	Ceramide	DKFZp434L0435		GANAB
Ceramide/Sphingomyelin	Sphinganine	DKFZp434L0435		GANC
Ceramide/Sphingomyelin	Sphingomyelin	DKFZp434L0435		GATB
Glycolysis and TCA cycle	Pyruvate	DLAT		GATC
Glycolysis and TCA cycle	Pyruvate	DLD		GATM
Carbohydrate	D-Mannose	DNASE1		GBA
Amino acid	L-Lysine	DOT1L		GBA2
Carbohydrate	D-Mannose	DPP4		GBA3
Amino acid	L-Proline	EGLN1		GBGT1
Amino acid	L-Proline	EGLN2		GCH1
Amino acid	L-Proline	EGLN3		GCK
Amino acid	L-Lysine	EHMT1		GCKR
Amino acid	L-Lysine	EHMT2		GDE1
Ceramide/Sphingomyelin	Ceramide	ENPP7		GFPT1
Ceramide/Sphingomyelin	Sphingomyelin	ENPP7		GFPT2
Amino acid	L-Proline	EPRS		GLA
Amino acid	L-Phenylalanine	EPX		GLS
Ceramide/Sphingomyelin	Ceramide	ERK		GLS2
Small metabolite/intermediate	Formicacid	ESD		GLTP
Amino acid	L-Lysine	EZH2		GLTPD1
Amino acid	L-Glutamine	F13A1		GLTPD2
Glycolysis and TCA cycle	Pyruvate	FAHD1		GLUL
Amino acid	L-Phenylalanine	FARS2		GLUT1
Amino acid	L-Phenylalanine	FARSA		GLYAT
Amino acid	L-Phenylalanine	FARSB		GLYATL1
Amino acid	L-Phenylalanine	FARSLA		GLYATL2
Ceramide/Sphingomyelin	Sphinganine	FVT1		GLYATL3
Carbohydrate	D-Glucose	G6PC		GM2A
Carbohydrate	D-Glucose	G6PC2		GM2-activator
Carbohydrate	D-Glucose	G6PC3		GMPS
Carbohydrate	D-Glucose	GAA		GNMT
Ceramide/Sphingomyelin	Ceramide	GALC		GNPTAB
Carbohydrate	D-Mannose	GALNT1		GOT1
Small metabolite/intermediate	Creatine	GAMT		GOT2
Small metabolite/intermediate	Guanidoaceticacid	GAMT		GPAA1
Carbohydrate	D-Glucose	GANAB		GPCPD1
Carbohydrate	D-Glucose	GANC		GPI
Amino acid	L-Glutamine	GATB		GPT
Amino acid	L-Glutamine	GATC		GPT2
Small metabolite/intermediate	Creatine	GATM		GUSB
Small metabolite/intermediate	Guanidoaceticacid	GATM		GYPB
Ceramide/Sphingomyelin	Ceramide	GBA		GZMB
Carbohydrate	D-Glucose	GBA		HAGH
Ceramide/Sphingomyelin	Ceramide	GBA2		HAGHL
Carbohydrate	D-Glucose	GBA2		HAL
Ceramide/Sphingomyelin	Sphinganine	GBA2		HARS
Ceramide/Sphingomyelin	Sphingomyelin	GBA2		HARS2
Carbohydrate	D-Glucose	GBA3		HDC
Ceramide/Sphingomyelin	Ceramide	GBGT1		HEMK1
Ceramide/Sphingomyelin	Sphinganine	GBGT1		HK1
Ceramide/Sphingomyelin	Sphingomyelin	GBGT1		HK2
Small metabolite/intermediate	Formicacid	GCH1		HK3
Carbohydrate	D-Glucose	GCK		HKDC1
Carbohydrate	D-Mannose	GCK		HOGA1
Carbohydrate	D-Glucose	GCKR		HS3ST3A1
Phospholipid	Choline	GDE1		IARS
Amino acid	L-Glutamine	GFPT1		IARS2
Amino acid	L-Glutamine	GFPT2		ID3
Carbohydrate	D-Glucose	GLA		IDH1
Carbohydrate	D-Mannose	GLA		IDH2
Amino acid	L-Glutamine	GLS		IDH3A
Amino acid	L-Glutamine	GLS2		IDH3B
Ceramide/Sphingomyelin	Ceramide	GLTP		IDH3G
Ceramide/Sphingomyelin	Sphinganine	GLTP		IFNB1
Ceramide/Sphingomyelin	Sphingomyelin	GLTP		IGF1R
Ceramide/Sphingomyelin	Ceramide	GLTPD1		IGF2R
Ceramide/Sphingomyelin	Sphinganine	GLTPD1		IL4I1
Ceramide/Sphingomyelin	Sphingomyelin	GLTPD1		ILVBL
Ceramide/Sphingomyelin	Ceramide	GLTPD2		ITPA
Ceramide/Sphingomyelin	Sphinganine	GLTPD2		IVD
Ceramide/Sphingomyelin	Sphingomyelin	GLTPD2		KARS
Amino acid	L-Glutamine	GLUL		KDM2A
Carbohydrate	D-Glucose	GLUT1		KDM2B
Bile acid	Glycocholicacid	GLYAT		KDSR
Amino acid	L-Phenylalanine	GLYAT		KLRB1
Bile acid	Glycocholicacid	GLYATL1		KMT2A
Amino acid	L-Glutamine	GLYATL1		KMT2B
Amino acid	L-Phenylalanine	GLYATL1		KMT2C
Bile acid	Glycocholicacid	GLYATL2		KMT2D
Amino acid	L-Phenylalanine	GLYATL2		KYAT1
Bile acid	Glycocholicacid	GLYATL3		KYAT3
Ceramide/Sphingomyelin	Ceramide	GM2A		KYNU
Ceramide/Sphingomyelin	Sphinganine	GM2A		L3HYPDH
Ceramide/Sphingomyelin	Sphingomyelin	GM2A		LALBA
Ceramide/Sphingomyelin	Ceramide	GM2-activator		LAP3
Ceramide/Sphingomyelin	Sphinganine	GM2-activator		LARS
Ceramide/Sphingomyelin	Sphingomyelin	GM2-activator		LARS2
Amino acid	L-Glutamine	GMPS		LBP
Glycolysis and TCA cycle	Citrate	GNMT		LCT
Carbohydrate	D-Mannose	GNPTAB		LDHA
Amino acid	L-Phenylalanine	GOT1		LDHAL6A
Amino acid	L-Phenylalanine	GOT2		LDHAL6B
Ceramide/Sphingomyelin	Ceramide	GPAA1		LDHB
Ceramide/Sphingomyelin	Sphinganine	GPAA1		LDHC
Ceramide/Sphingomyelin	Sphingomyelin	GPAA1		LDHD
Phospholipid	Choline	GPCPD1		LDLR
Carbohydrate	D-Glucose	GPI		LEPRE1
Amino acid	L-Alanine	GPT		LEPREL1
Glycolysis and TCA cycle	Pyruvate	GPT		LEPREL2
Amino acid	L-Alanine	GPT2		LGALS1
Glycolysis and TCA cycle	Pyruvate	GPT2		LPO
Carbohydrate	D-Mannose	GUSB		LTF
Carbohydrate	D-Mannose	GYPB		LYZ
Carbohydrate	D-Mannose	GZMB		MAN1A1
Glycolysis and TCA cycle	L-Lacticacid	HAGH		MAN1A2
Glycolysis and TCA cycle	L-Lacticacid	HAGHL		MAN1B1
Amino acid	L-Histidine	HAL		MAN1C1
Amino acid	L-Histidine	HARS		MAN2A1
Amino acid	L-Histidine	HARS2		MAN2A2
Amino acid	L-Histidine	HDC		MAN2B1
Amino acid	Pyruvate	HDC		MAN2B2
Amino acid	L-Histidine	HEMK1		MAOA
Carbohydrate	D-Glucose	HK1		MAOB
Carbohydrate	D-Mannose	HK1		MBL2
Carbohydrate	D-Glucose	HK2		MCCC1
Carbohydrate	D-Mannose	HK2		MCCC2
Carbohydrate	D-Glucose	HK3		MDH2
Carbohydrate	D-Mannose	HK3		ME1
Carbohydrate	D-Glucose	HKDC1		ME2
Carbohydrate	D-Mannose	HKDC1		ME3
Glycolysis and TCA cycle	Pyruvate	HOGA1		METTL2B
Glycolysis and TCA cycle	Citrate	HS3ST3A1		METTL6
Amino acid	L-Isoleucine	IARS		MGAM
Amino acid	L-Isoleucine	IARS2		MIF
Small metabolite/intermediate	Creatine	ID3		MLL
Glycolysis and TCA cycle	Isocitrate	IDH1		MLL2
Glycolysis and TCA cycle	Isocitrate	IDH2		MLL3
Glycolysis and TCA cycle	Isocitrate	IDH3A		MOCOS
Glycolysis and TCA cycle	Isocitrate	IDH3B		MOGS
Glycolysis and TCA cycle	Isocitrate	IDH3G		MPO
Carbohydrate	D-Mannose	IFNB1		MPST
Carbohydrate	D-Mannose	IGF1R		MTHFD1
Carbohydrate	D-Mannose	IGF2R		MTHFD1L
Glycolysis and TCA cycle	Citrate	IL4I1		MTHFD2
Amino acid	L-Isoleucine	IL4I1		NA
Amino acid	L-Phenylalanine	IL4I1		NADSYN1
Glycolysis and TCA cycle	Pyruvate	ILVBL		NFS1
Glycolysis and TCA cycle	Citrate	ITPA		NOS1
Ceramide/Sphingomyelin	Ceramide	IVD		NPC2
Amino acid	L-Lysine	KARS		NPL
Amino acid	L-Lysine	KDM2A		NPR3
Amino acid	L-Lysine	KDM2B		NSD1
Ceramide/Sphingomyelin	Sphinganine	KDSR		NSD2
Ceramide/Sphingomyelin	Ceramide	KLRB1		NSD3
Amino acid	L-Lysine	KMT2A		NSMAF
Amino acid	L-Lysine	KMT2B		P4HA1
Amino acid	L-Lysine	KMT2C		P4HA2
Amino acid	L-Lysine	KMT2D		P4HA3
Amino acid	L-Glutamine	KYAT1		P4HTM
Amino acid	L-Phenylalanine	KYAT1		P5CR2
Glycolysis and TCA cycle	Pyruvate	KYAT1		PAH
Glycolysis and TCA cycle	Pyruvate	KYAT3		PARS2
Amino acid	L-Alanine	KYNU		PC
Amino acid	L-Proline	L3HYPDH		PCCB
Carbohydrate	D-Glucose	LALBA		PCYT1A
Amino acid	L-Proline	LAP3		PCYT1B
Ceramide/Sphingomyelin	Ceramide	LARS		PDE5A
Ceramide/Sphingomyelin	Ceramide	LARS2		PDF
Ceramide/Sphingomyelin	Ceramide	LBP		PDHA1
Ceramide/Sphingomyelin	Sphinganine	LBP		PDHA2
Ceramide/Sphingomyelin	Sphingomyelin	LBP		PDHB
Ceramide/Sphingomyelin	Ceramide	LCT		PET112
Carbohydrate	D-Glucose	LCT		PFAS
Carbohydrate	D-Mannose	LCT		PGLYRP1
Glycolysis and TCA cycle	L-Lacticacid	LDHA		PGLYRP2
Glycolysis and TCA cycle	Pyruvate	LDHA		PGLYRP3
Glycolysis and TCA cycle	L-Lacticacid	LDHAL6A		PGLYRP4
Glycolysis and TCA cycle	Pyruvate	LDHAL6A		PGM1
Glycolysis and TCA cycle	L-Lacticacid	LDHAL6B		PHOSPHO1
Glycolysis and TCA cycle	Pyruvate	LDHAL6B		PHYKPL
Glycolysis and TCA cycle	L-Lacticacid	LDHB		PIG59
Glycolysis and TCA cycle	Pyruvate	LDHB		PIGA
Glycolysis and TCA cycle	L-Lacticacid	LDHC		PIGB
Glycolysis and TCA cycle	Pyruvate	LDHC		PIGC
Glycolysis and TCA cycle	L-Lacticacid	LDHD		PIGF
Glycolysis and TCA cycle	Pyruvate	LDHD		PIGG
Carbohydrate	D-Mannose	LDLR		PIGH
Amino acid	L-Proline	LEPRE1		PIGK
Amino acid	L-Proline	LEPREL1		PIGL
Amino acid	L-Proline	LEPREL2		PIGM
Carbohydrate	D-Mannose	LGALS1		PIGN
Amino acid	L-Phenylalanine	LPO		PIGO
Carbohydrate	D-Mannose	LTF		PIGP
Carbohydrate	D-Mannose	LYZ		PIGQ
Carbohydrate	D-Mannose	MAN1A1		PIGS
Carbohydrate	D-Mannose	MAN1A2		PIGT
Carbohydrate	D-Mannose	MAN1B1		PIGU
Carbohydrate	D-Mannose	MAN1C1		PIGV
Carbohydrate	D-Mannose	MAN2A1		PIGW
Carbohydrate	D-Mannose	MAN2A2		PIGX
Carbohydrate	D-Mannose	MAN2B1		PIGY
Carbohydrate	D-Mannose	MAN2B2		PIGZ
Small metabolite/intermediate	Dimethylamine	MAOA		PISD
Small metabolite/intermediate	Dimethylamine	MAOB		PKLR
Carbohydrate	D-Mannose	MBL2		PKM
Ceramide/Sphingomyelin	Ceramide	MCCC1		PKM2
Ceramide/Sphingomyelin	Ceramide	MCCC2		PLA2G1B
Glycolysis and TCA cycle	Citrate	MDH2		PLCD3
Glycolysis and TCA cycle	Pyruvate	ME1		PLD1
Glycolysis and TCA cycle	Pyruvate	ME2		PLD2
Glycolysis and TCA cycle	Pyruvate	ME3		PLD3
Amino acid	L-Histidine	METTL2B		PLD4
Amino acid	L-Histidine	METTL6		PLD6
Carbohydrate	D-Glucose	MGAM		PLEKHA8
Glycolysis and TCA cycle	Citrate	MIF		PLEKHA9
Amino acid	L-Lysine	MLL		PLOD1
Amino acid	L-Lysine	MLL2		PLOD2
Amino acid	L-Lysine	MLL3		PLOD3
Amino acid	L-Alanine	MOCOS		PLPP1
Carbohydrate	D-Glucose	MOGS		PLPP2
Fatty acid transport	Carnitine	MPO		PLPP3
Amino acid	L-Phenylalanine	MPO		PPAP2A
Glycolysis and TCA cycle	Pyruvate	MPST		PPAP2B
Small metabolite/intermediate	Formicacid	MTHFD1		PPAP2C
Small metabolite/intermediate	Formicacid	MTHFD1L		PPAT
Small metabolite/intermediate	Formicacid	MTHFD2		PPIA
Phospholipid	Choline	NA		PPIB
Amino acid	L-Glutamine	NADSYN1		PPIF
Amino acid	L-Alanine	NFS1		PPIG
Carbohydrate	D-Mannose	NOS1		PPIH
Ceramide/Sphingomyelin	Ceramide	NPC2		PRDM2
Ceramide/Sphingomyelin	Sphinganine	NPC2		PRDX6
Ceramide/Sphingomyelin	Sphingomyelin	NPC2		PRKCA
Glycolysis and TCA cycle	Pyruvate	NPL		PRMT3
Carbohydrate	D-Mannose	NPR3		PRODH
Amino acid	L-Lysine	NSD1		PRODH2
Amino acid	L-Lysine	NSD2		PROSC
Amino acid	L-Lysine	NSD3		PRRX1
Ceramide/Sphingomyelin	Ceramide	NSMAF		PSAP
Amino acid	L-Proline	P4HA1		PTDSS1
Amino acid	L-Proline	P4HA2		PTDSS2
Amino acid	L-Proline	P4HA3		PTGS1
Amino acid	L-Proline	P4HTM		PYCR1
Amino acid	L-Proline	P5CR2		PYCR2
Amino acid	L-Phenylalanine	PAH		PYCR3
Amino acid	L-Proline	PARS2		PYCRL
Glycolysis and TCA cycle	Pyruvate	PC		QARS
Amino acid	L-Valine	PCCB		QRSL1
Phospholipid	Choline	PCYT1A		RHO
Phospholipid	Choline	PCYT1B		RIMKLB
Glycolysis and TCA cycle	Citrate	PDE5A		RNASE1
Small metabolite/intermediate	Formicacid	PDF		RNASE3
Glycolysis and TCA cycle	Pyruvate	PDHA1		SAMD8
Glycolysis and TCA cycle	Pyruvate	PDHA2		SCARB1
Glycolysis and TCA cycle	Pyruvate	PDHB		SCLY
Amino acid	L-Glutamine	PET112		SDS
Amino acid	L-Glutamine	PFAS		SDSL
Amino acid	L-Alanine	PGLYRP1		SERPINC1
Amino acid	L-Alanine	PGLYRP2		SERPIND1
Amino acid	L-Alanine	PGLYRP3		SETD2
Amino acid	L-Alanine	PGLYRP4		SETD7
Carbohydrate	D-Glucose	PGM1		SETDB1
Phospholipid	Choline	PHOSPHO1		SGMS1
Amino acid	L-Alanine	PHYKPL		SGMS2
Amino acid	L-Glutamine	PIG59		SGPL1
Ceramide/Sphingomyelin	Ceramide	PIGA		SGPP1
Ceramide/Sphingomyelin	Sphinganine	PIGA		SGPP2
Ceramide/Sphingomyelin	Sphingomyelin	PIGA		SI
Ceramide/Sphingomyelin	Ceramide	PIGB		SIGLEC7
Ceramide/Sphingomyelin	Sphinganine	PIGB		SLC10A1
Ceramide/Sphingomyelin	Sphingomyelin	PIGB		SLC10A2
Ceramide/Sphingomyelin	Ceramide	PIGC		SLC16A1
Ceramide/Sphingomyelin	Sphinganine	PIGC		SLC16A10
Ceramide/Sphingomyelin	Sphingomyelin	PIGC		SLC16A2
Ceramide/Sphingomyelin	Ceramide	PIGF		SLC16A3
Ceramide/Sphingomyelin	Sphinganine	PIGF		SLC16A4
Ceramide/Sphingomyelin	Sphingomyelin	PIGF		SLC16A5
Ceramide/Sphingomyelin	Ceramide	PIGG		SLC16A6
Ceramide/Sphingomyelin	Sphinganine	PIGG		SLC16A7
Ceramide/Sphingomyelin	Sphingomyelin	PIGG		SLC16A8
Ceramide/Sphingomyelin	Ceramide	PIGH		SLC1A4
Ceramide/Sphingomyelin	Sphinganine	PIGH		SLC1A5
Ceramide/Sphingomyelin	Sphingomyelin	PIGH		SLC22A1
Ceramide/Sphingomyelin	Ceramide	PIGK		SLC22A16
Ceramide/Sphingomyelin	Sphinganine	PIGK		SLC22A4
Ceramide/Sphingomyelin	Sphingomyelin	PIGK		SLC22A5
Ceramide/Sphingomyelin	Ceramide	PIGL		SLC25A20
Ceramide/Sphingomyelin	Sphinganine	PIGL		SLC25A29
Ceramide/Sphingomyelin	Sphingomyelin	PIGL		SLC27A5
Ceramide/Sphingomyelin	Ceramide	PIGM		SLC2A1
Ceramide/Sphingomyelin	Sphinganine	PIGM		SLC36A1
Ceramide/Sphingomyelin	Sphingomyelin	PIGM		SLC38A3
Ceramide/Sphingomyelin	Ceramide	PIGN		SLC44A1
Ceramide/Sphingomyelin	Sphinganine	PIGN		SLC44A2
Ceramide/Sphingomyelin	Sphingomyelin	PIGN		SLC44A3
Ceramide/Sphingomyelin	Ceramide	PIGO		SLC44A4
Ceramide/Sphingomyelin	Sphinganine	PIGO		SLC5A7
Ceramide/Sphingomyelin	Sphingomyelin	PIGO		SLC6A12
Ceramide/Sphingomyelin	Ceramide	PIGP		SLC6A14
Ceramide/Sphingomyelin	Sphinganine	PIGP		SLC6A7
Ceramide/Sphingomyelin	Sphingomyelin	PIGP		SLC6A8
Ceramide/Sphingomyelin	Ceramide	PIGQ		SLC7A8
Ceramide/Sphingomyelin	Sphinganine	PIGQ		SLCO1A2
Ceramide/Sphingomyelin	Sphingomyelin	PIGQ		SLCO1B1
Ceramide/Sphingomyelin	Ceramide	PIGS		SLCO1B3
Ceramide/Sphingomyelin	Sphinganine	PIGS		SLCO2A1
Ceramide/Sphingomyelin	Sphingomyelin	PIGS		SLCO2B1
Ceramide/Sphingomyelin	Ceramide	PIGT		SLCO4A1
Ceramide/Sphingomyelin	Sphinganine	PIGT		SMPD1
Ceramide/Sphingomyelin	Sphingomyelin	PIGT		SMPD2
Ceramide/Sphingomyelin	Ceramide	PIGU		SMPD3
Ceramide/Sphingomyelin	Sphinganine	PIGU		SMPD4
Ceramide/Sphingomyelin	Sphingomyelin	PIGU		SPHK1
Ceramide/Sphingomyelin	Ceramide	PIGV		SPHK2
Ceramide/Sphingomyelin	Sphinganine	PIGV		SRB1
Ceramide/Sphingomyelin	Sphingomyelin	PIGV		SRC
Ceramide/Sphingomyelin	Ceramide	PIGW		SRR
Ceramide/Sphingomyelin	Sphinganine	PIGW		TAT
Ceramide/Sphingomyelin	Sphingomyelin	PIGW		TGM1
Ceramide/Sphingomyelin	Ceramide	PIGX		TGM2
Ceramide/Sphingomyelin	Sphinganine	PIGX		TGM3
Ceramide/Sphingomyelin	Sphingomyelin	PIGX		TGM4
Ceramide/Sphingomyelin	Ceramide	PIGY		TGM5
Ceramide/Sphingomyelin	Sphinganine	PIGY		TGM6
Ceramide/Sphingomyelin	Sphingomyelin	PIGY		TGM7
Ceramide/Sphingomyelin	Ceramide	PIGZ		TH
Ceramide/Sphingomyelin	Sphinganine	PIGZ		TREH
Ceramide/Sphingomyelin	Sphingomyelin	PIGZ		TRPM1
Phospholipid	Phosphatidylcholine	PISD		TST
Glycolysis and TCA cycle	Pyruvate	PISD		UCK2
Glycolysis and TCA cycle	Pyruvate	PKLR		UGCG
Glycolysis and TCA cycle	Pyruvate	PKM		UGT8
Glycolysis and TCA cycle	Pyruvate	PKM2		VARS
Carbohydrate	D-Mannose	PLA2G1B		VARS2
Ceramide/Sphingomyelin	Sphingomyelin	PLCD3		WBP7
Phospholipid	Choline	PLD1		WBSCR22
Phospholipid	Choline	PLD2		WHSC1
Phospholipid	Choline	PLD3		WHSC1L1
Phospholipid	Choline	PLD4		XDH
Phospholipid	Choline	PLD6
Ceramide/Sphingomyelin	Ceramide	PLEKHA8
Ceramide/Sphingomyelin	Sphinganine	PLEKHA8
Ceramide/Sphingomyelin	Sphingomyelin	PLEKHA8
Ceramide/Sphingomyelin	Ceramide	PLEKHA9
Ceramide/Sphingomyelin	Sphinganine	PLEKHA9
Ceramide/Sphingomyelin	Sphingomyelin	PLEKHA9
Amino acid	L-Lysine	PLOD1
Amino acid	L-Lysine	PLOD2
Amino acid	L-Lysine	PLOD3
Ceramide/Sphingomyelin	Ceramide	PLPP1
Ceramide/Sphingomyelin	Sphinganine	PLPP1
Ceramide/Sphingomyelin	Ceramide	PLPP2
Ceramide/Sphingomyelin	Sphinganine	PLPP2
Ceramide/Sphingomyelin	Ceramide	PLPP3
Ceramide/Sphingomyelin	Sphinganine	PLPP3
Ceramide/Sphingomyelin	Ceramide	PPAP2A
Ceramide/Sphingomyelin	Sphinganine	PPAP2A
Ceramide/Sphingomyelin	Ceramide	PPAP2B
Ceramide/Sphingomyelin	Sphinganine	PPAP2B
Ceramide/Sphingomyelin	Ceramide	PPAP2C
Ceramide/Sphingomyelin	Sphinganine	PPAP2C
Amino acid	L-Glutamine	PPAT
Amino acid	L-Proline	PPIA
Amino acid	L-Proline	PPIB
Amino acid	L-Proline	PPIF
Amino acid	L-Proline	PPIG
Amino acid	L-Proline	PPIH
Amino acid	L-Lysine	PRDM2
Amino acid	L-Phenylalanine	PRDX6
Phospholipid	Phosphatidylcholine	PRKCA
Amino acid	L-Histidine	PRMT3
Amino acid	L-Proline	PRODH
Amino acid	L-Proline	PRODH2
Amino acid	L-Proline	PROSC
Small metabolite/intermediate	Creatine	PRRX1
Ceramide/Sphingomyelin	Sphingomyelin	PSAP
Phospholipid	Phosphatidylcholine	PTDSS1
Phospholipid	Phosphatidylcholine	PTDSS2
Carbohydrate	D-Mannose	PTGS1
Amino acid	L-Proline	PYCR1
Amino acid	L-Proline	PYCR2
Amino acid	L-Proline	PYCR3
Amino acid	L-Proline	PYCRL
Amino acid	L-Glutamine	QARS
Amino acid	L-Glutamine	QRSL1
Carbohydrate	D-Mannose	RHO
Glycolysis and TCA cycle	Citrate	RIMKLB
Glycolysis and TCA cycle	Citrate	RNASE1
Glycolysis and TCA cycle	Citrate	RNASE3
Ceramide/Sphingomyelin	Sphingomyelin	SAMD8
Phospholipid	Phosphatidylcholine	SCARB1
Amino acid	L-Alanine	SCLY
Glycolysis and TCA cycle	Pyruvate	SCLY
Glycolysis and TCA cycle	Pyruvate	SDS
Glycolysis and TCA cycle	Pyruvate	SDSL
Carbohydrate	D-Mannose	SERPINC1
Carbohydrate	D-Mannose	SERPIND1
Amino acid	L-Lysine	SETD2
Amino acid	L-Lysine	SETD7
Amino acid	L-Lysine	SETDB1
Ceramide/Sphingomyelin	Ceramide	SGMS1
Ceramide/Sphingomyelin	Sphingomyelin	SGMS1
Ceramide/Sphingomyelin	Ceramide	SGMS2
Ceramide/Sphingomyelin	Sphingomyelin	SGMS2
Ceramide/Sphingomyelin	Ceramide	SGPL1
Ceramide/Sphingomyelin	Sphinganine	SGPP1
Ceramide/Sphingomyelin	Sphinganine	SGPP2
Carbohydrate	D-Glucose	SI
Carbohydrate	D-Mannose	SIGLEC7
Glycolysis and TCA cycle	L-Lacticacid	SLC16A1
Glycolysis and TCA cycle	Pyruvate	SLC16A1
Amino acid	L-Alanine	SLC16A10
Amino acid	L-Glutamine	SLC16A10
Amino acid	L-Histidine	SLC16A10
Amino acid	L-Isoleucine	SLC16A10
Amino acid	L-Phenylalanine	SLC16A10
Amino acid	L-Proline	SLC16A10
Amino acid	L-Valine	SLC16A10
Glycolysis and TCA cycle	Pyruvate	SLC16A10
Glycolysis and TCA cycle	Pyruvate	SLC16A2
Glycolysis and TCA cycle	L-Lacticacid	SLC16A3
Glycolysis and TCA cycle	Pyruvate	SLC16A3
Glycolysis and TCA cycle	Pyruvate	SLC16A4
Glycolysis and TCA cycle	Pyruvate	SLC16A5
Glycolysis and TCA cycle	Pyruvate	SLC16A6
Glycolysis and TCA cycle	L-Lacticacid	SLC16A7
Glycolysis and TCA cycle	Pyruvate	SLC16A7
Glycolysis and TCA cycle	Pyruvate	SLC16A8
Amino acid	L-Alanine	SLC1A4
Amino acid	L-Glutamine	SLC1A5
Phospholipid	Choline	SLC22A1
Fatty acid transport	Carnitine	SLC22A16
Fatty acid transport	Carnitine	SLC22A4
Fatty acid transport	Carnitine	SLC22A5
Small metabolite/intermediate	Creatine	SLC22A5
Fatty acid transport	Carnitine	SLC25A20
Fatty acid transport	Carnitine	SLC25A29
Carbohydrate	D-Glucose	SLC2A1
Amino acid	L-Alanine	SLC36A1
Amino acid	L-Alanine	SLC38A3
Amino acid	L-Glutamine	SLC38A3
Amino acid	L-Histidine	SLC38A3
Phospholipid	Choline	SLC44A1
Phospholipid	Choline	SLC44A2
Phospholipid	Choline	SLC44A3
Phospholipid	Choline	SLC44A4
Phospholipid	Choline	SLC5A7
Small metabolite/intermediate	Betaine	SLC6A12
Amino acid	L-Proline	SLC6A14
Amino acid	L-Proline	SLC6A7
Small metabolite/intermediate	Creatine	SLC6A8
Amino acid	L-Alanine	SLC7A8
Amino acid	L-Glutamine	SLC7A8
Amino acid	L-Phenylalanine	SLC7A8
Fatty acid transport	Carnitine	SLCO1B1
Glycolysis and TCA cycle	Pyruvate	SLCO2A1
Glycolysis and TCA cycle	Citrate	SLCO2B1
Ceramide/Sphingomyelin	Ceramide	SMPD1
Ceramide/Sphingomyelin	Sphingomyelin	SMPD1
Ceramide/Sphingomyelin	Ceramide	SMPD2
Ceramide/Sphingomyelin	Sphingomyelin	SMPD2
Ceramide/Sphingomyelin	Ceramide	SMPD3
Phospholipid	Phosphatidylcholine	SMPD3
Ceramide/Sphingomyelin	Sphingomyelin	SMPD3
Ceramide/Sphingomyelin	Ceramide	SMPD4
Phospholipid	Phosphatidylcholine	SMPD4
Ceramide/Sphingomyelin	Sphingomyelin	SMPD4
Ceramide/Sphingomyelin	Ceramide	SPHK1
Ceramide/Sphingomyelin	Sphinganine	SPHK1
Ceramide/Sphingomyelin	Sphinganine	SPHK2
Phospholipid	Phosphatidylcholine	SRB1
Glycolysis and TCA cycle	Citrate	SRC
Glycolysis and TCA cycle	Pyruvate	SRR
Amino acid	L-Phenylalanine	TAT
Amino acid	L-Glutamine	TGM1
Amino acid	L-Glutamine	TGM2
Amino acid	L-Glutamine	TGM3
Amino acid	L-Glutamine	TGM4
Amino acid	L-Glutamine	TGM5
Amino acid	L-Glutamine	TGM6
Amino acid	L-Glutamine	TGM7
Amino acid	L-Phenylalanine	TH
Carbohydrate	D-Glucose	TREH
Amino acid	L-Proline	TRPM1
Glycolysis and TCA cycle	Pyruvate	TST
Glycolysis and TCA cycle	Citrate	UCK2
Ceramide/Sphingomyelin	Ceramide	UGCG
Ceramide/Sphingomyelin	Ceramide	UGT8
Amino acid	L-Valine	VARS
Amino acid	L-Valine	VARS2
Amino acid	L-Lysine	WBP7
Amino acid	L-Histidine	WBSCR22
Amino acid	L-Lysine	WHSC1
Amino acid	L-Lysine	WHSC1L1
Fatty acid transport	Carnitine	XDH
Bile acid	Chenodeoxycholic acid	AKR1C2
Glycolysis and TCA cycle	Chenodeoxycholic acid	SLCO1B1
Glycolysis and TCA cycle	Chenodeoxycholic acid	SLCO4A1
Bile acid	Chenodeoxycholic acid	AKR1C1
Glycolysis and TCA cycle	Chenodeoxycholic acid	ABCC3
Glycolysis and TCA cycle	Chenodeoxycholic acid	SLC27A5
Glycolysis and TCA cycle	Chenodeoxycholic acid	SLCO1B3
Fatty acid transport	Chenodeoxycholic acid	ACOT8
Fatty acid transport	Chenodeoxycholic acid	FABP6
Glycolysis and TCA cycle	Chenodeoxycholic acid	SLC10A2
Glycolysis and TCA cycle	Chenodeoxycholic acid	SLC10A1
Bile acid	Chenodeoxycholic acid	ABCB11
Glycolysis and TCA cycle	Chenodeoxycholic acid	SLCO1A2
