# Supplementary material for: Integration of metabolites from meta-analysis with transcriptome reveals enhanced SPHK1 in PDAC with a background of pancreatitis
Source: BMC Cancer. 2022 Jul 19;22:792. doi: 10.1186/s12885-022-09816-6 (PMC9295503; doi:10.1186/s12885-022-09816-6)
Supplement: Supplementary file 6 — Additional file 6: Dataset S5. Splicing index of dysregulated genes. [file 12885_2022_9816_MOESM6_ESM.xlsx]

## Sheet: Upregulated
SPHK1
PSR/JUC ID	2 Avg (log2)	0 Avg (log2)	Splicing Index	P-val
JUC17006324.hg.1	8.01789	6.48714	2.26352	0.0451673
JUC17006329.hg.1	9.09702	6.76363	4.01917	0.01604
JUC17006332.hg.1	7.91798	9.82349	-4.68484	0.0100652
PIGC
PSR/JUC ID	2 Avg (log2)	0 Avg (log2)	Splicing Index	P-val
PSR01054638.hg.1	5.76081	4.24819	2.20967	0.0189011
PSR01054639.hg.1	5.438	6.38631	-2.02462	0.0263443
PSR01054656.hg.1	6.09455	4.62	2.36395	0.019388
JUC01028508.hg.1	19.9315	15.2906	21.6292	3.72138e-05
PKM
PSR/JUC ID	2 Avg (log2)	0 Avg (log2)	Splicing Index	P-val
PSR15021961.hg.1	9.67351	12.8856	-4.9166	0.0200078
PPIB
PSR/JUC ID	2 Avg (log2)	0 Avg (log2)	Splicing Index	P-val
PSR15014681.hg.1	7.80595	12.3276	-10.02	0.0214061
PSR15014682.hg.1	10.4305	9.90998	3.50882	0.00699454

## Sheet: Dnregulated-Tumor supressors
AKR1B1
PSR/JUC ID	2 Avg (log2)	0 Avg (log2)	Splicing Index	P-val
PSR07029188.hg.1	6.26927	9.51584	-9.65292	0.00788487
PSR07029196.hg.1	6.38492	8.36248	-3.81596	0.0109551
PSR07029197.hg.1	6.76305	8.37157	-2.9852	0.000238068
PSR07029198.hg.1	5.00786	6.99772	-3.88786	0.039391
PSR07029200.hg.1	5.75877	4.67394	2.18491	0.0117046
JUC07014428.hg.1	6.54925	8.47134	-3.74909	0.0239139
JUC07014432.hg.1	7.91674	10.5754	-6.28103	0.0153938
JUC07014437.hg.1	4.32114	6.74259	-5.18834	0.011542
AZGP1
PSR/JUC ID	2 Avg (log2)	0 Avg (log2)	Splicing Index	P-val
PSR07025295.hg.1	5.09541	4.8598	3.84925	0.014174
PSR07025297.hg.1	6.50142	6.44886	4.87316	0.0256496
PSR07025294.hg.1	5.80023	12.583	-22.9742	0.0118087
PSR07025299.hg.1	5.81812	13.2368	-37.6515	0.0333587
PSR07025301.hg.1	7.9668	11.0113	-3.03283	0.0447113
PSR07025302.hg.1	8.37932	14.3722	-15.4144	0.025785
PSR07025309.hg.1	5.62364	5.59353	3.10152	0.0315841
PSR07025310.hg.1	9.01572	8.18329	5.27227	0.0167299
JUC07012479.hg.1	9.43535	7.87169	7.07719	0.0163857
JUC07012481.hg.1	3.94122	12.3692	-75.4742	0.0461005
EGLN1
PSR/JUC ID	2 Avg (log2)	0 Avg (log2)	Splicing Index	P-val
PSR01060090.hg.1	7.42659	11.8357	-5.36361	0.0254163
PSR01060091.hg.1	8.43141	13.6134	-7.8496	0.00536791
PSR01060095.hg.1	4.85712	5.01762	3.74248	0.0485067
PSR01060099.hg.1	6.66051	6.62134	5.03899	0.00347735
PSR01060100.hg.1	6.44708	6.38253	4.30703	0.00567791
JUC01031441.hg.1	4.76951	4.83025	3.69765	0.00788575
JUC01031442.hg.1	6.17567	5.96281	4.09627	0.0449996
JUC01031443.hg.1	7.93009	14.1331	-16.6885	0.0249475
GNMT
PSR/JUC ID	2 Avg (log2)	0 Avg (log2)	Splicing Index	P-val
PSR06006723.hg.1	6.71728	6.73023	14.9363	0.000292997
PSR06006724.hg.1	6.61418	12.0014	-2.80483	0.00484578
PSR06006725.hg.1	6.35642	12.3523	-5.17899	0.00156324
PSR06006727.hg.1	6.37316	9.27329	2.53448	0.0157859
JUC06002902.hg.1	3.74811	12.7102	-25.1414	0.0479009
KMT2C
PSR/JUC ID	2 Avg (log2)	0 Avg (log2)	Splicing Index	P-val
PSR07031343.hg.1	5.47474	5.21354	4.83082	0.0114448
PSR07031364.hg.1	8.78565	7.75105	9.55714	0.0200032
PSR07031347.hg.1	5.49745	5.71252	4.57216	0.00419278
PSR07031397.hg.1	19.9315	19.9315	4.06806	0.0141883
PSR07031424.hg.1	7.63726	13.3674	-10.5968	0.00292773
PSR07031421.hg.1	6.17571	11.2844	-6.9478	0.000122097
PSR07031416.hg.1	7.12435	11.3593	-4.37181	0.0116113
PSR07031410.hg.1	8.28069	13.045	-7.47341	0.0111467
PSR07031426.hg.1	6.03396	5.63363	4.71506	0.0208193
PSR07031425.hg.1	6.44109	10.8699	-5.51648	0.00945931
JUC07015584.hg.1	12.3695	11.006	12.5653	0.0399667
PSR07031427.hg.1	8.40722	14.8163	-17.0583	0.0135913
PSR07031430.hg.1	7.0366	12.4424	-10.1391	0.0148591
PSR07031432.hg.1	8.06492	7.99231	5.12195	0.0178658
PSR07031434.hg.1	7.49671	6.83239	6.23961	0.00179776
PSR07031435.hg.1	11.7326	11.5841	6.68605	0.0147282
PSR07031436.hg.1	9.35217	9.42866	4.35408	0.0189972
JUC07015591.hg.1	8.9788	15.477	-25.2988	0.0307428
PSR07031437.hg.1	9.7185	9.69924	4.48642	0.0170658
JUC07015539.hg.1	5.86113	5.43521	5.86301	0.00028681
JUC07015544.hg.1	6.69529	6.04657	6.33487	0.0269744
JUC07015561.hg.1	6.69644	14.524	-59.401	0.0136078
JUC07015568.hg.1	7.14397	7.47242	3.2892	0.0126759
JUC07015570.hg.1	6.08407	5.7212	7.07164	0.0325559
JUC07015571.hg.1	8.98446	8.01949	9.86252	0.00218039
JUC07015589.hg.1	8.3	13.2668	-7.63642	0.0172333
JUC07015577.hg.1	15.1237	12.5031	23.3878	0.0182695
JUC07015588.hg.1	19.9315	19.9315	4.06806	0.0141883
JUC07015536.hg.1	6.08258	11.654	-8.6003	0.000501377
PSR07031417.hg.1	6.41898	11.2763	-6.64906	0.00519439
JUC07015600.hg.1	8.4049	13.3588	-7.40318	0.0155862
PSR07031346.hg.1	5.97983	11.0475	-8.66609	0.000346096
PSR07031348.hg.1	5.76763	5.66261	3.93482	0.00587207
PSR07031349.hg.1	6.44234	9.97641	-2.88564	0.0195646
PSR07031359.hg.1	8.85346	9.50209	2.51537	0.0237274
PSR07031363.hg.1	8.22334	13.5645	-10.2821	0.0243865
PSR07031369.hg.1	7.22698	6.74798	5.73431	0.00176853
PSR07031376.hg.1	4.01759	4.75629	2.32336	0.0140501
PSR07031377.hg.1	9.8279	10.1169	3.28858	0.0130134
PSR07031381.hg.1	7.64844	8.16271	3.42149	0.0297675
PSR07031382.hg.1	7.99516	8.96313	2.4595	0.0112776
PSR07031387.hg.1	6.21468	7.14543	2.41802	0.0124729
PSR07031389.hg.1	9.07094	15.4024	-17.889	0.000106772
PSR07031396.hg.1	6.62101	12.2955	-8.77187	0.00692055
PSR07031398.hg.1	6.55531	10.6823	-4.13192	0.0041461
PSR07031399.hg.1	7.45087	13.3377	-15.517	0.00572437
PSR07031400.hg.1	5.98984	9.71678	-2.96066	0.0041374
PSR07031402.hg.1	6.17744	9.63718	-2.5605	0.0338017
PSR07031403.hg.1	8.39099	14.5449	-14.0204	9.39686e-06
PSR07031405.hg.1	6.13413	10.5028	-5.07291	0.00123982
PSR07031422.hg.1	9.0518	13.3567	-4.45758	0.00673296
JUC07015601.hg.1	13.4653	12.932	5.87481	0.0340592
